1 ***Parabacteroides distasonis* enhances Type 1 Diabetes autoimmunity via molecular mimicry**

2

3 Qian Huang<sup>1</sup>, I-Ting Chow<sup>2</sup>, Claudia Brady<sup>1</sup>, Amol Raisingani<sup>1</sup>, Danmeng Li<sup>3</sup>, David A. Ostrov<sup>3</sup>,  
4 Mark A. Atkinson<sup>3,4</sup>, William W. Kwok<sup>2</sup>, C. Ronald Kahn<sup>5</sup>, Emrah Altindis<sup>1\*</sup>

5

6 <sup>1</sup> Boston College Biology Department, Higgins Hall, 140 Commonwealth Avenue Chestnut Hill,  
7 MA 02467, USA

8 <sup>2</sup> Benaroya Research Institute at Virginia Mason, Seattle, WA 98101, USA

9 <sup>3</sup> Department of Pathology, Immunology and Laboratory Medicine, College of Medicine,  
10 University of Florida Diabetes Institute, Gainesville, FL 32610-3633, USA

11 <sup>4</sup> Department of Pediatrics, College of Medicine, University of Florida Diabetes Institute,  
12 Gainesville, FL 32610-3633, USA

13 <sup>5</sup> Joslin Diabetes Center, Harvard Medical School, Boston, MA, 02215, USA

14 **\*Corresponding Author:** Emrah Altindis, Boston College Biology Department, Higgins Hall,  
15 140 Commonwealth Avenue Chestnut Hill, MA 02467. E-mail: [altindis@bc.edu](mailto:altindis@bc.edu)

16

17 **One Sentence Summary:** The human gut commensal bacterium, *Parabacteroides distasonis*,  
18 accelerates type 1 diabetes in the NOD mouse model of the disease and involves expression of an  
19 insulin B:9-23 epitope mimic, supporting a potential disease mechanism involving molecular  
20 mimicry.

21

22 **ABSTRACT**

23 Type 1 Diabetes (T1D) is an autoimmune disease characterized by destruction of pancreatic  $\beta$ -  
24 cells. Focusing on the main insulin epitope, insulin B-chain 9-23 (insB:9-23), we explored whether  
25 a microbial insB:9-23 mimic could modulate T1D. We now demonstrate that a microbial insB:9-  
26 23 mimic of *Parabacteroides distasonis*, a human gut commensal, exclusively stimulates non-  
27 obese diabetic (NOD) mouse T cells specific to insB:9-23. Indeed, immunization of NOD mice  
28 with either the bacterial mimic peptide or insB:9-23 further verified the cross-reactivity in vivo.  
29 Modeling *P. distasonis* peptide revealed a potential pathogenic register 3 binding. *P. distasonis*  
30 colonization of the female NOD mice gut accelerated T1D onset. In addition, adoptive transfer of  
31 splenocytes from NOD mice colonized with *P. distasonis* to NOD.SCID recipients conferred the  
32 enhanced disease phenotype. Integration analysis of published infant T1D gut microbiome data  
33 revealed that *P. distasonis* peptide is not present in the gut microbiota in the first year of life of  
34 infants that eventually develop T1D. Furthermore, *P. distasonis* peptide can stimulate human T  
35 cell clones specific to insB:9-23 and T1D patients demonstrated a strong humoral immune  
36 response to *P. distasonis* than controls. Taken together, our studies define a potential molecular  
37 mimicry link between T1D pathogenesis and the gut microbiota.

38

39

## 40 INTRODUCTION

41 Type 1 diabetes (T1D) is an autoimmune disease characterized by selective destruction of  
42 pancreatic  $\beta$ -cells by autoreactive T cells (1). The incidence rate of T1D in children is rising on an  
43 annual basis both in Europe (3.4 %) and the USA (1.4 %) (2, 3). Genome-wide association studies  
44 (GWAS) have identified ~50 genetic regions that influence the risk of developing T1D, but  
45 genetics alone cannot account for the increasing incidence rates of T1D. For example, incidence  
46 rates of T1D in two neighboring regions, Russian Karelia and Finnish Karelia are six-fold  
47 different; despite a very similar genetic background of the inhabitants (4). Furthermore, even  
48 among identical twins, the concordance of T1D is only 40-60% (5, 6). Various environmental  
49 factors have been studied including diet, birth mode, infections and antibiotics; however, the roles  
50 of these factors and cause of T1D largely remain unknown (7-9). This said, recent gut microbiome  
51 studies have observed an altered microbial and metabolite composition, and increased intestinal  
52 permeability in subjects with T1D (10-14). In addition to gut microbes, viral infections have also  
53 been suggested to play a role in T1D, yet no studies have identified a direct causal link (15). Taken  
54 together, these data suggest that genetics alone cannot explain the risk of T1D autoimmunity.

55 One of the earliest markers of T1D autoimmunity is the development of islet autoantibodies  
56 against insulin (IAA), glutamic acid decarboxylase (GADA), insulinoma-associated autoantigen 2  
57 (IA-2A), zinc transporter 8 (ZnT8A) and islet specific glucose-6-phosphatase catalytic subunit  
58 related protein (IGRP, recently named G6PC2) (16, 17). Among these, insulin is the only  
59 autoantigen exclusively expressed by  $\beta$ -cells, with IAA usually the first to be detected (18, 19). In  
60 humans, IAA develop months to years before the onset of overt diabetes (20), and, there is a  
61 significant correlation between IAA concentration and rate of progression to T1D (21). In addition  
62 to humoral immune responses, insulin is a target of  $CD4^+$  T cells in both humans and murine

63 autoimmune diabetes. In the NOD mouse model of T1D (22), over 90% of the anti-insulin CD4<sup>+</sup> T  
64 cell clones target amino acids 9-23 of the insulin B chain (insB:9-23) (23). Importantly, InsB:9-23  
65 specific T-cells have also been identified in islets obtained from human organ donors with T1D  
66 (24, 25) as well as in peripheral blood lymphocytes of living T1D patients (19, 26, 27). Clearly  
67 lacking in this field are studies that have the ability to pull together such findings and, bring  
68 together a central hypothesis for testing of a strong, well supported, central hypothesis.

69 In this regard, the concept of molecular mimicry has long been noted as a potential trigger  
70 for autoimmunity; one when the immune response cannot discriminate a foreign antigen from a  
71 self-protein (8, 28). In this study, we hypothesized that exposure to a microbial insulin epitope  
72 mimic could stimulate an autoimmune response initiating T1D onset. To address this question, we  
73 screened for microbial mimics of insB:9-23 and subsequently evaluated one such mimic from a  
74 gut commensal, *Parabacteroides distasonis*; this, for the notion of stimulating insB:9-23-specific  
75 human and NOD T cells ex vivo as well as to modulate T1D progression in vivo. We also leveraged  
76 existing human gut microbiota datasets from the BABYDIET and DIABIMMUNE studies to  
77 explore microbial colonization and expression of insB:9-23 mimics during the first years of life in  
78 children who later developed T1D. Taken together, our studies demonstrated that insulin epitope  
79 mimics in the gut microbiota may play an important role in T1D onset, via a molecular mimicry  
80 mechanism, particularly when exposed after the neonatal period of immune development.

81

82

83

84

## 85 RESULTS

### 86 *Parabacteroides distasonis* insB:9-23 like peptide cross-reacts with NOD mouse T cell 87 hybridomas specific to insB:9-23

88 To test our aforementioned molecular mimicry hypothesis, we focused on the dominant T-cell  
89 epitope, insB:9-23. We first identified microbial insB:9-23 peptide mimics, searching the NCBI  
90 databases for viral (taxid:10239), bacterial (taxid:2) and fungal (taxid:4751) proteomes using the  
91 insB:9-23 sequence (SHLVEALYLVCGERG) as the query sequence. We identified 47 microbial  
92 peptides with over eight residues identical with the insulin peptide (**Table S1**). Among these  
93 microbial mimics, 17 bacterial and viral mimics contained the previously identified residues in the  
94 insB:9-23 critical for binding to the NOD MHC I-A<sup>g7</sup> and human HLA-DQ2-8 molecule (**Table**  
95 **1**). To test whether microbial insB:9-23 mimics can stimulate NOD T cells, we used IIT3 and 8F10  
96 T cell hybridomas. IIT3 recognizes presented insulin protein as well as the insB:9-23 peptide,  
97 whereas 8F10 recognizes only the insB:9-23 peptide (29). We also used a C3g7 cell line expressing  
98 a large amount of I-A<sup>g7</sup>, as antigen presenting cells (APCs). Among the 17 microbial peptides  
99 tested, only one stimulated IIT-3 hybridomas (**Figure 1A**). This peptide contained in the N-  
100 terminal of the hypoxanthine phosphoribosyltransferase (hpt) protein of *P. distasonis* 33B formerly  
101 known as *Bacteroides* sp. 2\_1\_33B (30) (**Figure S1A**). Yang et al. recently demonstrated that  
102 residues from insB:15-20 are essential to stimulate the human T cell clones via register 3 (27).  
103 Indeed, the *P. distasonis* peptide is the only tested microbial mimic that has all six residues  
104 conserved in this region (**Table 1, S1**). Notably, *P. distasonis* 33B and D13 strains are the only  
105 organisms that possess this unique insB:9-23 mimic sequence in their genomes in the NCBI dataset  
106 (as of September 12, 2020, **Figure S1B-C, Supplementary Document 1-2**). Taken together, as a

107 member of the human gut microbiome, *P. distasonis* makes an interesting candidate for T1D  
108 autoimmunity.

109 With these results, we repeated the T cell hybridoma stimulation experiment using *P.*  
110 *distasonis* lysate or growth culture instead of the 15-mer peptide, but did not observe a robust  
111 response (**Figure S3A-B**). However, it is well known that some bacterial proteins are not expressed  
112 in vitro and require specific conditions mimicking in vivo (31). Indeed, using RT-qPCR, we  
113 observed extremely low gene expression of Hpt in our *P. distasonis* culture (**Figure S3C**).  
114 Moreover, we performed an SDS-PAGE gel of the bacterial lysate and analyzed all bands between  
115 20 and 50 kDa. *P. distasonis* Hpt protein, which is predicted to be 27.3 kDa, was not identified  
116 among the 464 proteins detected by liquid chromatography-mass spectrometry (LC-MS) MS  
117 analysis (**Table S2**).

118

119 **Structural modeling of *P. distasonis* insB:9-23-like peptide suggests potential binding to**  
120 **MHC in a specific register.**

121 Previous studies have demonstrated the importance of specific insB:9-23 peptide positions in  
122 anchoring the peptide to the MHC binding cleft in a manner that determines the binding register  
123 (32). To understand the molecular mechanism underlying such cross-reactivity, we developed an  
124 in silico model of the *P. distasonis* peptide compared to the native insB:9-23 epitope (**Figure 1B,**  
125 **S2**). Glutamic acid at position 9 (P9) of insB:9-23 confers binding in “register 2”, whereas non-  
126 glutamic acid side chains, such as arginine, impose peptide binding in “register 3”(32). Variants  
127 of insB:9-23 presented in register 3 elicit stronger autoreactive T cell responses compared to  
128 insB:9-23 presented in register 2. In the context of register 3, the *P. distasonis* mimic and insB:9-  
129 23 peptide share a high degree of sequence homology except at P9. The *P. distasonis* mimic

130 peptide has a tyrosine (Y) at P9 versus serine (S) in the native insulin epitope, whereas most of the  
131 other microbial mimics have an arginine (R) at P9, which is not expected to shift the register. The  
132 binding model of insB:9-23 and *P. distasonis* peptide revealed that the *P. distasonis* mimic peptide  
133 has the potential to bind MHC in register 3, thus resulting in presentation of peptide side chains  
134 that are identical between insB:9-23 and *P. distasonis* (**Figure 1B, S2A-B**). These data support  
135 our observation that T cells responding to the register 3 bound insulin peptide have the ability to  
136 cross react with the *P. distasonis* peptide in register 3 (**Figure 1A**).

137

### 138 **Immunization of NOD mice with *P. distasonis* peptide stimulates cross-reactive T-cells**

139 To further explore this peptide cross-reactivity, we immunized NOD mice with either (i) insB:9-  
140 23 peptide or, (ii) *P. distasonis* mimic peptide with Complete Freund's Adjuvant (CFA). After 7  
141 days, we collected the popliteal lymph nodes and examined T cell activity by enzyme-linked  
142 immunospot (ELISpot) for interferon-gamma (IFN $\gamma$ ) and IL-2 secretion; this, following *in vitro*  
143 stimulation with either the insB9-23 or microbial mimic peptide. Immunization of mice with the  
144 *P. distasonis* peptide generated a cross-reactive immune response to insB9-23 (**Figure 1C and**  
145 **1E**). Likewise, immunization of mice with insB:9-23 stimulated a cross-reactive response to the  
146 *P. distasonis* peptide, which was even stronger than the stimulation with the insulin peptide  
147 (**Figure 1D and 1F**).

148

### 149 ***P. distasonis* colonization accelerates diabetes onset in female NOD mice**

150 Based on our findings on cross-reactivity, we hypothesized that *P. distasonis* colonization and  
151 exposure to the microbial insB:9-23 mimic can trigger the immune response and stimulate  
152 autoimmunity in NOD mice. To test this hypothesis, we orally gavaged both male and female

153 NOD mice with *P. distasonis* ( $10^9$  CFU *P. distasonis*/mouse/day) or saline daily after weaning,  
154 starting at 3 weeks of age (**Figure 2A**, n=40/group). Neither male nor female NOD mice carried  
155 *P. distasonis* in their gut under specific pathogen free (SPF) housing conditions (**Figure 2B**),  
156 providing an ideal control to determine the effect of the *P. distasonis* colonization on T1D onset.  
157 After 30 days of oral gavage, we detected colonization of the gut with *P. distasonis* (**Figure 2B**).  
158 At 12 weeks of age (pre-diabetic), we randomly separated five mice from each group and collected  
159 the pancreas for immunostaining. Interestingly, the *P. distasonis* colonized female NOD mice  
160 showed significantly higher insulinitis scores as compared to controls (**Fig 2C**, **Fig S4A**  
161 **representative figures**). Moreover, *P. distasonis* colonization significantly accelerated T1D onset  
162 in female NOD mice (survival: 42% versus 19.5%) (**Figure 2D**). This effect was specific to the  
163 female mice as no differences in insulinitis or T1D incidence were observed in male mice  
164 administered *P. distasonis* versus saline (**Figure 2C-D**).

165

#### 166 ***P. distasonis* stimulates a specific humoral immune response in colonized NOD mice.**

167 To determine whether *P. distasonis* colonization can stimulate IAA seroconversion, we measured  
168 IAA levels with ELISA at 12 weeks of age in study animals. Only a small fraction of the mice had  
169 circulating IAA at this early point, with no significant differences between study groups detected  
170 (**Fig. S4B**). Western blot analysis using plasma samples obtained from the same NOD mice (12  
171 weeks) revealed that *P. distasonis* colonization stimulated a very strong humoral immune response  
172 to the bacterium in both female and male NOD mice (**Figure 2E-F**). To evaluate the specificity of  
173 this humoral response, we performed a similar Western blot using the plasma samples to detect  
174 lysates from another well studied gut commensal, *Bacteroides fragilis*, that was shown to have



175 immunomodulatory effects in NOD mice (33). As expected, we detected a weak humoral immune  
176 response to *B. fragilis* lysates in both the saline and *P. distasonis* treated groups (**Figure S4C-D**).  
177 Serum LPS levels were not significantly different between the groups indicating that this *P.*  
178 *distasonis* specific humoral response did not result from gut barrier dysfunction (leaky gut)  
179 stimulated by *P. distasonis* colonization (**Figure 2G**). We measured multiple (n=32) serum  
180 cytokines and chemokines using a multiplex Luminex assay (Millipore) to determine whether *P.*  
181 *distasonis* colonization of the female NOD mice alters the systemic immune response but did not  
182 detect any differences between the two groups (**Table S3**). These results suggest that *P. distasonis*  
183 stimulates a specific immune response but not IAA or elevated proinflammatory cytokines.

#### 184 **Adoptive transfer of splenocytes enhance T1D onset in immunodeficient NOD.SCID mice**

185 We next performed an adoptive transfer experiment (**Figure 3A**) using immunodeficient  
186 NOD.SCID mice, which lack functional B or T cells, as recipients (34). We orally gavaged a new  
187 cohort of the NOD mice with *P. distasonis* or saline (n=16-20/group) as described above and  
188 transferred  $5 \times 10^7$  splenocytes from individual NOD donor mice to 6 week old NOD.SCID  
189 recipients (1:1 ratio, sex-matched, n=16-20 per group) (**Figure 3B**). Consistent with the  
190 spontaneous T1D experiment (**Figure 2D**), recipient female NOD.SCID mice that received  
191 splenocytes from the *P. distasonis* treated group developed T1D at a significantly higher rate  
192 (**Figure 3C**). Thus, an adaptive immune response stimulated by *P. distasonis* exposure in female  
193 NOD mice is sufficient to transfer and accelerate T1D.

194

#### 195 **Subcutaneous injection of *P. distasonis* peptide is protective in female NOD mice**

196 Subcutaneous injection of mouse insulin 2, B:9-23 into female NOD mice for 25 weeks was shown  
197 to be protective in female NOD mice, with this result explained by a T helper 2 (Th2) cell shift in  
198 immune response (35). To determine whether a different route of *P. distasonis* peptide  
199 administration is protective, we injected female (n=20/peptide) and male (n=20/peptide) NOD  
200 mice with i) insB:9-23 insulin 2, ii) the *P. distasonis* B:9-23 mimic, iii) saline (vector), or iv)  
201 tetanus toxoid (TT) control peptide weekly for 20 weeks beginning at 4 weeks of age. Consistent  
202 with the oral gavage experiments (**Figures 2D and 3C**), we did not observe any effect of *P.*  
203 *distasonis* B:9-23 peptide on male NOD mice (**Figure 3D**) while insB:9-23 and the *P. distasonis*  
204 peptide significantly delayed T1D onset in female NOD mice (**Figure 3E**). This further confirms  
205 the cross reactivity between insB:9-23 and the *P. distasonis* peptide mimic, but the route of  
206 exposure (i.e., subcutaneous versus mucosal) appears to impact the ability to modulate T1D onset  
207 (**Figure 2D and 3E**).

208

209 ***P. distasonis* B:9-23 like peptide is not present in the gut microbiota of children developing**  
210 **T1D in the first year of life.**

211 To investigate a potential role for the *P. distasonis* insB:9-23 mimic in human T1D, we analyzed  
212 published human gut microbiome data emanating from the BABYDIET study, where 16S Illumina  
213 sequencing was used to analyze stool samples collected from 22 children who developed islet  
214 autoantibodies, with 10 developing diabetes after a median follow-up time of 5 years, as well as  
215 from 22 healthy subjects from birth to 3 years of age (36). We searched for the operational  
216 taxonomic units (OTUs) identified as *P. distasonis* and classified the data according to sample  
217 collection time (0-1, 1-2 and 2-3 years of age) and subject disease status at the end of the study

218 (control, autoantibody (Ab) positive, or T1D). *P. distasonis* was present in control children at all  
219 three time points, but was only identified in the second year of age and later in the children who  
220 developed T1D. Moreover, compared to controls, fewer *P. distasonis* OTUs were identified for  
221 the first year in the 12 children who developed autoantibodies but did not progress to T1D during  
222 follow-up (**Figure 4A**). A key limitation of this 16S rRNA gene sequencing data is the inability to  
223 determine whether the identified *P. distasonis* OTUs carry the insulin B9-23 mimic peptide.

224 To address this, we next analyzed published DIABIMMUNE metagenomic data obtained  
225 from three countries: Russia, Finland and Estonia (11). In this study, researchers performed  
226 shotgun metagenomics sequencing on stool samples collected annually from genetically  
227 predisposed subjects from birth to age 3 years in Finland, Russia and Estonia (n=74/country). To  
228 identify optimized alignments, we first assembled the contigs and searched for DNA sequences  
229 capable of encoding the *P. distasonis* peptide. Consistent with the BABYDIET results (**Figure**  
230 **4A**), we were unable to identify the *P. distasonis* epitope mimic in the first year of life for subjects  
231 who later developed autoantibodies (seroconverted, Ab positive **Figure 4B**). We next analyzed the  
232 data stratified by country. While no subjects were exposed to the *P. distasonis* peptide in the first  
233 year of age, the peptide was identified in all subjects who develop autoantibodies in Estonia after  
234 age one and in Russia after age two. In contrast, the children who developed autoantibodies in  
235 Finland were never exposed to this peptide in the first three years of age; suggesting a potential  
236 later time point of exposure or a different trigger (**Fig. 4C**). In sum, these results suggest that the  
237 late exposure to the *P. distasonis* insB:9-23 mimic in years 2-3 of childhood might trigger an  
238 immune response and stimulate autoimmunity. Indeed, these observations are consistent with our  
239 findings in NOD mice. Colonization of the gut microbiota with to *P. distasonis* after weaning, at  
240 a late time point relative to immune development, accelerated the disease in female NOD mice.

241 ***P. distasonis* peptide can stimulate insB:9-23 specific human T-cell clones**

242 To further characterize the immune response against *P. distasonis*, we investigated the humoral  
243 response in human T1D patients to determine their exposure. Specifically, we tested antibody  
244 responses using serum obtained from female subjects with T1D and age and ethnicity matched  
245 controls (n=8/group, median age 16.2, median duration 4.3 years). Indeed, four of eight female  
246 subjects with T1D demonstrated an elevated immune response to *P. distasonis* lysates compared  
247 to the eight controls and other T1D four samples (**Figure 4D Table S4**). Because T1D is T-cell  
248 mediated, we also tested whether the *P. distasonis* insB:9-23 mimic or 17 other insB:9-23 like  
249 peptides (**Table 1**) could stimulate insB:11-23-specific T cell clones isolated from participant  
250 T1D#3 in (27). The insB:9-23R<sup>22E</sup> peptide was previously shown to be more potent than insB:9-  
251 23 in stimulating insB:9-23 hybridomas from NOD mice (32) and human T-cell clones (27); hence  
252 we used both insB:9-23R<sup>22E</sup> and insB:9-23 as positive controls and a scrambled peptide as a  
253 negative control (**Table 1**). Consistent with our findings with NOD mice hybridomas (**Figure 1**),  
254 the *P. distasonis* peptide (peptide 1) was the only microbial peptide among 17 tested that could  
255 stimulate human T cells to produce IFN-g (**Figure 4E, F**).

256

257

## 258 DISCUSSION

259 There have been tremendous efforts to understand the triggers of T1D autoimmunity, however, the  
260 etiology of the disease is complex and remains incompletely characterized. In this study, we  
261 investigated molecular mimicry as a potential mechanism linking microbial flora to T1D onset.  
262 Molecular mimicry mechanisms are based on the degeneracy of T cell recognition (37, 38) and  
263 can be either pathogenic (39) or protective (40). While the molecular mimicry hypothesis was  
264 popular in T1D research in the 1990s (41-43), progress in this area is very limited in the last 20  
265 years (44). In the current study, taking advantage of these growing genome databases, we identified  
266 candidate microbial mimic peptides for the T1D target epitope, insB:9-23. We further show that  
267 stimulation of the immune system with a gut commensal's, *P. distasonis*, insB:9-23 like peptide  
268 can stimulate an immune response to the endogenous insB:9-23. Moreover, exposure to *P.*  
269 *distasonis* during gut microbiota development caused increased infiltration to the islets and  
270 accelerated diabetes onset in female NOD mice. This pathogenic effect was mediated by  
271 splenocytes as evidenced by adoptive transfer to female NOD.SCID mice.

272 A plethora of human gut microbiome studies demonstrated that the composition of the gut  
273 microbiota of patients with autoimmune diseases including multiple sclerosis (45), systemic lupus  
274 erythematosus, anti-phospholipid syndrome (46), Crohn's disease (47-49), ulcerative colitis (50),  
275 inflammatory bowel diseases (51, 52), and coeliac disease (53) are significantly different from  
276 healthy controls. Although the methodologies and conclusions differ in microbiota studies from  
277 subjects with and at-risk for T1D (11-13, 54), there is a common pattern. Specifically, the diversity  
278 of T1D patients' gut microbiome is decreased while there is an increased prevalence of  
279 *Bacteroidetes* taxa and an altered metabolomic profile compared to healthy controls (14). Most of  
280 these studies are observational and do not define any mechanism related to T1D onset. One

281 exception is the DIABIMMUNE study (13) wherein authors concluded that the higher T1D rates  
282 in Finnish Karelia and Estonia compared to Russian Karelia might be related to the gut microbiota  
283 composition. They suggest that while Russian infants are exposed to *Escherichia coli* LPS, the  
284 Finnish and Estonian infants are exposed to *Bacteroides* species' LPS, which inhibits endotoxin  
285 tolerance. They also showed that injection of *E. coli* LPS protected NOD mice from developing  
286 T1D; however, they did not report any data validating the LPS hypothesis for human T1D.

287         As the largest human gut microbiome study collecting 12,005 samples from 903 children  
288 in four countries in seven locations, The Environmental Determinants of Diabetes in the Young  
289 (TEDDY) trial identified *Parabacteroides* as the most significantly associated genus with T1D  
290 (55). This is consistent with our findings related to *P. distasonis* mimic analysis from Russia and  
291 Estonia wherein 100% of the children developing T1D had the *P. distasonis* peptide in their gut  
292 microbiota in years 2-3 of life. The TEDDY study also recently showed that human gut microbiota  
293 development is divided in three phases: a developmental phase (months 3-14), a transitional phase  
294 (months 15-30), and a stable phase (months 31-46) (55). Using the DIABIMMUNE sequencing  
295 data, we showed that the *P. distasonis* insB:9-23 mimic peptide is not present in the gut microbiota  
296 during the developmental phase (i.e., the first year of life) in the children who go on to develop  
297 T1D. Our data suggest that the absence of *P. distasonis* in the developmental phase may be critical  
298 in T1D pathogenesis. A recent study showed that in addition to thymic education of the immune  
299 system for self-tolerance, the microbiota provides a post-thymic education to provide tolerance to  
300 commensal microbiota (56). Thus, the presence of the *P. distasonis* insB:9-23 mimic in this early  
301 stage might promote tolerance to the insulin epitope. Hence, there might be a window of  
302 opportunity for exposure during the developmental phase of gut microbiota development during  
303 which the *P. distasonis* peptide might stimulate regulatory T cells (Tregs) and immunotolerance

304 for insB:9-23. Although further studies are needed to investigate the direct link between human  
305 T1D and *P. distasonis*, the cross-reactivity of the insB:9-23 mimic with human T cell clones  
306 represents a clear potential mechanism. Furthermore, the strong humoral immune response to *P.*  
307 *distasonis* lysate clearly shows the exposure and humoral immune response in a fraction of T1D  
308 patients.

309 In addition to their critical role in NOD mouse diabetes onset (57), insB:9-23 specific CD4<sup>+</sup>  
310 T cells were identified in human islets (24, 25) and in peripheral blood of T1D patients (19, 26,  
311 27). While our study is insB:9-23 centric, there are other epitopes recognized by human islet-  
312 infiltrating or circulating T-cells in insulin B-chain (58), A-chain (59, 60) or C-peptides (24, 25).  
313 A recent discovery showed that hybrid insulin peptides (HIPs) are novel epitopes formed with  
314 post-translational modifications formed in the beta cell granules (61-63). Likewise, defective  
315 ribosomal products (Drips) of insulin were shown to lead of aberrant insulin polypeptides  
316 rendering beta cells immunogenic (64). Babon et al. recently showed that CD4<sup>+</sup> and CD8<sup>+</sup> T cell  
317 lines or clones isolated from the islets of nine donors with T1D are stimulated by several islet  
318 antigens including GAD, insulin, IA-2 and HIPs (65). Given the enormous number of microbial  
319 peptides produced by the gut microbiota, we expect that others may exist with the potential to  
320 mimic these additional epitopes and trigger cognate autoantigen reactive T cells. Indeed, Tai et al.  
321 identified a microbial peptide mimic produced by *Fusobacteria* that can stimulate IGRP-specific  
322 mouse T cells and promote diabetes development in a new TLR-deficient (TLR<sup>-/-</sup>) and  
323 MyD88<sup>-/-</sup> NY8.3 NOD mouse model (66).

324 Although gut microbiota has a critical role in modulating T1D onset in NOD mice (67),  
325 there are very few studies focusing on the effects of a single bacterium. For example, the presence  
326 of segmented filamentous bacteria correlated with protection in NOD mice (68). Likewise,

327 Hanninen et al. showed that oral gavage of female NOD mice with *Akkermensia muciniphila* from  
328 weaning until 10 weeks of age delayed diabetes (69). Using a chemically induced enhanced gut  
329 permeability condition, Sofi et al. showed that oral administration of heat-killed (HK) *B. fragilis*  
330 suppressed autoimmunity in NOD mice (33). On the other hand, intravenous injection of NOD  
331 mice with HK *B. fragilis* accelerated disease progression. Indeed, the importance of immunization  
332 route is well appreciated in vaccinology (70) and highlighted by our experiments where oral  
333 gavage of female NOD mice with *P. distasonis* stimulated a pathogenic response via the mucosal  
334 immune system whereas subcutaneous immunization with the *P. distasonis* insB:9-23 mimic  
335 stimulated protection. This latter finding corroborates a previous report demonstrating that  
336 immunization with the native insB:9-23 peptide reduces T1D incidence in female NOD mice (35).

337 To our knowledge, *P. distasonis* is the first bacterium that can accelerate the disease onset  
338 in the NOD mice. We showed that *P. distasonis* is not naturally present in the NOD mice gut  
339 microbiome in our SPF facility. Although this provides a good control to determine the effects of  
340 *P. distasonis* on T1D onset, it has limitations. Because *P. distasonis* is not previously used for  
341 genetic mutations and do not have established protocols, we failed to make a mutant of *P.*  
342 *distasonis* that has a deletion or mutations of the mimic peptide. Further *in vivo* studies are needed  
343 to establish the direct link between the mimic peptide and the effects of the colonization.

344 Today, we have databases with enormous amounts of microbial and microbiome  
345 sequencing data that can be leveraged to address the role of molecular mimicry in autoimmunity.  
346 Indeed, we see the return of the molecular mimicry hypothesis in the autoimmunity field with  
347 recent studies on T1D (66), lupus (71), inflammatory cardiomyopathy (72), and multiple sclerosis  
348 (73). These studies, including ours, constitute a new link to gut antigens and autoimmune diseases  
349 with the potential to ultimately provide new tools including vaccines, antibiotics or probiotics for



350 prevention and treatment of autoimmune disease. The uniqueness of the *P. distasonis* insB:9-23  
351 mimic peptide in NCBI databases supports our ongoing efforts to characterize its effect based on  
352 Koch's postulates.

353 In conclusion, our data show that the *P. distasonis* insB:9-23 like peptide stimulates human  
354 and NOD mice T cells specific to native insB:9-23. Intestinal colonization of female NOD mice  
355 with *P. distasonis* accelerates autoimmune diabetes. This phenotype can be adoptively transferred  
356 to NOD.SCID mice demonstrating the direct role of immune cells stimulated by *P. distasonis*.  
357 More importantly, human data show that delayed exposure to the *P. distasonis* insB:9-23 mimic  
358 might be pathogenic in the first three years of life.

## 359 MATERIAL AND METHODS

### 360 Bioinformatics

361 We performed a comprehensive bioinformatics search for the presence of the microbial peptide  
362 sequences with homology to human insB:9-23 sequence at the National Center for Biotechnology  
363 Information (NCBI). A bioinformatics search was performed by NCBI BLASTp using insB:9-23  
364 sequence as query against viral (NCBI taxonomic ID: 10239), bacterial (NCBI taxonomic ID: 2)  
365 and fungal (NCBI taxonomic ID: 10239) proteomes. The whole peptide sequence of each  
366 significant hit was compared with insB:9-23 using a multiple sequence alignment program (Clustal  
367 Omega) to determine the number of the identical and conserved residues. This yielded the data in  
368 Tables 1 and S1. An additional bioinformatics search was performed to determine whether *P.*  
369 *distasonis* peptide is unique. We used *P. distasonis* peptide (15 aa) or *P. distasonis* hypoxanthine  
370 phosphoribosyltransferase protein sequences as queries and searched against BLASTp using non  
371 redundant protein sequences. This yielded the data in Figure S1 and Supplementary documents 1-  
372 2.

### 373 Mouse procedures

374 NOD/ShiLtJ (NOD) and NOD. *Cg-Pcrkdc scid/J* (NOD.Scid) mice were purchased from Jackson  
375 Laboratory. Mice were maintained and bred in Boston College Animal Care Facility. All of the  
376 mice were maintained under specific pathogen-free conditions in a 12-h dark/light cycle with  
377 autoclaved food, water and bedding. All experiments complied with regulations and ethics  
378 guidelines of the National Institute of Health and were approved by the IACUC of Boston College  
379 (no B2019-003, 2019-004).

380

## 381 **Human Plasma Samples**

382 Peripheral blood was collected from living subjects following the provision of written informed  
383 consent (and assent in the case of minors) in accordance with IRB approved protocols (University  
384 of Florida IRB# 201400703) and the Declaration of Helsinki.

## 385 **Human T-Cell Clone Stimulation.**

386 Twenty 15-mer peptides (**Table 1**) used in human and mouse T-cell stimulation experiments were  
387 chemically synthesized by Genscript (TFA removal, >85% purity). The peptides were dissolved  
388 in DMSO at 20 mg/mL (~12 mM). Human T-cell clone stimulation assays were performed as  
389 previously described (74). Briefly, insulin B: 11-23-specific T-cell clones were stimulated in 96-  
390 well round bottom plates with irrelevant, specific, or microbial mimotope peptides in the presence  
391 of irradiated DQ8-transdimer-transfected HEK293 cells as APCs. 50  $\mu$ l of supernatants from  
392 cultures of T cell clones were collected after 48 h stimulation and added to each well of 96-well  
393 round bottom plates precoated with IFN- $\gamma$  (clone MD-1) capturing antibodies (BioLegend). After  
394 overnight incubation, bound cytokines were detected by biotinylated anti-IFN- $\gamma$  (clone 4s.B3) and  
395 quantified using a Victor2 D time resolved fluorometer (Perkin Elmer). Experiments were  
396 performed in the presence of 1  $\mu$ g/ml of anti-CD28 antibodies. Unless otherwise stated, peptide  
397 concentrations were 2.5  $\mu$ M.

## 398 **Binding Model for *P. distasonis* peptide**

399 Coordinates for the insB:9-23 peptide bound to HLA-DQ8 were superimposed on I-Ag7  
400 complexed to GAD peptide. The insB:9-23 was extracted and merged with I-Ag7, and energy  
401 minimized to model peptide binding in register 2. Side chains of the insB:9-23 peptide were  
402 mutated to accommodate the register 3 shift, followed by energy minimization. *P. distasonis*

403 peptide and insB:9-23 peptide sequences were aligned and the coordinates mutated to the *P.*  
404 *distasonis* peptide, and the resulting model of peptide complexed to I-Ag7 was energy minimized.  
405 The MHC I binding predictions were made on 11/30/2019 using the IEDB analysis resource  
406 Consensus tool (75) which combines predictions from ANN aka NetMHC (4.0) (76-78), SMM  
407 (79) and Comblib (80) .

#### 408 **NOD mice T-cell stimulation and antigen presentation assay**

409 We performed the experiments as described previously (29). The peptides were ordered from  
410 Genscript (TFA removal, >85% purity) and dissolved in a base buffer consisting of 50mM NaCl,  
411 10mM HEPES, pH6.8 with 200uM TCEP. Because *P. distasonis* peptide has a neutral charge, we  
412 included 5% DMSO to dissolve it (final DMSO concentration is less than 1%). The C3g7 cell line,  
413 which express an abundance of MHC-II I-Ag7, was used as APC and were treated with 1/2log  
414 dilutions of peptide (starting from 10uM). These cells were then cultured with the IIT-3 or 8F10 T  
415 cell hybridomas for 18 h. Culture supernatants were assayed for IL-2 by incubation with the CTLL-  
416 2 cell line. CTLL-2 cells are responsive to IL-2 and only actively divide in the presence of IL-2.  
417 We then determined the 3H uptake (CPM) to measure how many CTLL cells are proliferating  
418 using a scintillation counter.

#### 419 **Immunization of the NOD mice**

420 The experiments were performed as described previously (81). Briefly, 13 week old male NOD  
421 mice (n=2 mice per group) were immunized in the footpad with the *P. distasonis* peptide or insulin  
422 B:9-23 peptide (10nmoles/mouse). After 7 days, the draining lymph nodes were removed and  
423 pooled for examination by ELISpot. In the ELISpot assay, node cells were recalled with the various  
424 peptides to elicit either an IL-2 or IFN-g response. Spots were analyzed by Immunospot 5.0  
425 (C.T.L.)

## 426 **Reanalysis of the published metagenomics data**

427 BABYDIET 16S sequencing data (36) (22 cases and 22 matched controls) were provided by Dr.  
428 David Endesfelder (Scientific Computing Research Unit, Helmholtz Zentrum München, Munich,  
429 Germany). To determine the abundance of the OTUs corresponding to each group, we calculated  
430 the normalized average number of *P. distasonis* OTUs (Figure 4A) for each group based on the  
431 collection time of the stool samples, e.g. 0-1, 1-2 and 2-3 years. Data is shown with median OTU  
432 number/group normalized to the means of each sample. We downloaded the DIABIMMUNE data  
433 with the help of Dr. Alex Kostic. Because the reads were not ideal for a peptide search, we first  
434 assembled the reads using SPAdes (11) and they are available at <https://github.com/ablab/spades>.  
435 We used these assembled contigs for a TBLASTN search to identify “RILVELLYLVCSEYL”  
436 encoding sequences in these samples. We then classified the data based on the collection time of  
437 the stool samples, e.g. 0-1, 1-2 and 2-3 years (Figure 4B) and country (Figure 4C).

## 438 **Bacterial culture**

439 *Parabacteroides distasonis* D 13 strain was purchased from Dr. Emma Allen-Vercoe’s laboratory  
440 at University of Guelph. Dr. Allen-Vercoe’s group isolated this bacterium from the colon of a  
441 ulcerative colitis patient. *P. distasonis* D13 strain and *Bacteroides fragilis* (ATCC® 25285) were  
442 cultured in anaerobic culture broth (Tryptic Soy Broth supplemented with 5ug/ml Hemin (BD  
443 Biosciences) and 1ug/ml Vitamin K1 (VWR)) at 37°C in anaerobic chamber (Coy Laboratory  
444 Product).

## 445 **Oral gavage of *Parabacteroides distasonis* into NOD mice**

446 After *P. distasonis* were cultured from frozen stock at 37°C overnight (OD=1.5), *P. distasonis*  
447 were collected by centrifuging at 4000 rpm for 10 min and washed 3 times with sterile saline

448 (Baxter). After the last wash, *P. distasonis* were re-suspended with saline and oral gavaged using  
449 22ga plastic feeding tube (Instech Laboratories) (100ul/mouse, 10<sup>9</sup> CFU/mouse). 3-week-old NOD  
450 mice were oral gavaged with *Parabacteroides distasonis* D13 daily for four weeks right after  
451 weaning for 4 weeks (n=40/group/sex). Control groups were gavaged with sterile saline.

#### 452 **Fecal bacterial DNA extraction**

453 Mouse fecal samples were collected as fecal pellets in Eppendorf tubes and stored at -80°C right  
454 after collection. The DNA were extracted from 100 mg mouse fecal samples using QIAamp  
455 PowerFecal Pro DNA kit (Qiagen) following manufacturer's instruction.

#### 456 **Quantification of *Parabacteroides distasonis* by qPCR**

457 Bacterial DNA was extracted from NOD mice fecal samples (9-week old) 2 weeks after oral  
458 gavage was completed as described in Fecal bacteria DNA extraction section. qPCR was  
459 conducted using QuantStudio 3 Real-Time PCR System (Applied Biosystems) at 95°C for 10 mins  
460 followed by 40 cycles of 15 sec at 95°C and 1 min at 60°C with Power SYBR Green Master Mix  
461 (Applied Biosystems) following manufacturer's instruction. The primers were described  
462 previously and listed in Table S5 (82, 83). The relevant abundance of *Parabacteroides distasonis*  
463 was determined by normalized with *Eubacteria*.

#### 464 **HPT expression in *Parabacteroides distasonis* by RT-qPCR**

465 Bacterial RNA was extracted from *Parabacteroides distasonis* using ZymoBIOMICS DNA/RNA  
466 kit (Zymo Research). RNA reverse-transcription and first strand synthesis were performed using  
467 QuantStudio 3 (Applied Biosystems) following manufacturer's instruction. cDNAs were applied  
468 for quantitative PCR through the same system mentioned above All sample reactions running in  
469 triplicate. The primers were designed to reverse transcribe 200 bp fragments of HPT using primer

470 blast. The primers target all bacteria 16S and *Parabacteroides distasonis* 16S rRNA were  
471 described previously and listed in Table S5(84). Data obtained were normalized using 16S rRNA  
472 expression levels as reference and relative expression was determined by calculating the  $\Delta\Delta Cq$ .

#### 473 **Immunization of NOD mice with *P. distasonis* peptide**

474 The peptides were synthesized by GenScript USA Inc. 15-mer peptides, Insulin epitope peptide  
475 (LVELLYLVCSEYLNH), insulin 2 peptide (SHLVEALYLCSGERG), or 14-mer tetanus toxin  
476 peptide (QYIKANSKFIGIFE) (Purity>85%; 10ug/mouse/week) in saline were subcutaneously  
477 injected into NOD mice (n=20) weekly from 4 weeks old until 25 weeks old as described  
478 previously (35). Tail vein blood glucose was monitored weekly and mice with >250mg/dl for two  
479 consecutive days as diabetic.

#### 480 **Immune cells transplantation**

481 Splenocytes were isolated from spleen and pancreatic lymph nodes of 15 weeks donor NOD mice  
482 by filtering through a sterile nylon mesh followed by red blood cell lysis with ACK (Lonza). The  
483 isolated splenocytes were intravenously injected through lateral tail vein into recipient NOD SCID  
484 mice (9 weeks old) ( $5 \times 10^7$  cells/mouse). Donor NOD mice and recipient NOD.SCID mice were  
485 sex matched. Recipient mice were monitored for diabetes by checking tail vein blood glucose level  
486 (>250mg/dl) twice per week. The experiment terminated 11 weeks after the transplantation unless  
487 the mice were diagnosed with diabetes. Donor mice were 15-week male or female NOD mice  
488 colonized with either *P. distasonis* or their sex matched saline control (n=16).

#### 489 **Insulinitis score**

490 Pancreas were isolated from *P. distasonis* colonized 12 weeks NOD mice and control mice (n=5)  
491 followed by fixation with 4% paraformaldehyde overnight at 4°C, embedding with paraffin,

492 sectioning into 5µm thickness and stained with hematoxylin-eosin (Harvard University, BIDMC  
493 Histology Core). Slides were analyzed using EVOS XL Core microscope with a LPlan PH2  
494 10×/0.25 and a LPlan PH2 20×/0.40 objective. The pancreatic insulinitis was screened and evaluated  
495 as described previously (85).

#### 496 **Western Blot analysis**

497 Bacteria lysis protein were extracted with CellLytic B Cell Lysis Reagent (Sigma) following  
498 manufacturer's instruction. Protein concentration were determined by BCA assay (Thermo  
499 Scientific). 20 µg bacterial protein was loaded for well for the gel. Standard western blots were  
500 performed by using tank blotting (Bio-rad) as membrane transfer equipment for 1h at 4°C.  
501 Membrane were then blocked with 5% non fat milk+PBST. After washing, each membrane was  
502 incubated with mouse serum (1: 2,500) or human serum (1: 10,000) overnight at 4°C followed by  
503 washing and Sheep anti-mouse (1:3000, Millipore) or goat anti-human antibody (1:3000, Santa  
504 Cruz) incubation for 1h. After washing, the blots were developed with chemiluminescent substrate  
505 ECL (Thermo Fisher)

#### 506 **Endotoxin and IAA quantification and ELISA**

507 12-week NOD Mouse serum was collected and stored at -80 °C until use. Serum endotoxin level  
508 was measured by using a Pierce Chromogenic Endotoxin Quant Kit (Thermo Scientific) following  
509 the manufacturers' instructions. We used mouse IAA ELISA Kit (MyBioSource, MBS26087) to  
510 measure IAA levels. The experiment was completed according manufacturer's instructions.

#### 511 **Luminex**

512 MCYTMAG-70K-PX32 Milliplex Mouse Cytokine/Chemokine MAGNETIC BEAD Premixed  
513 32 Plex Kit (**MilliporeSigma**) was used to determine circulating cytokines and chemokines in



514 mice plasma. The experiment was performed according to manufacturer's instructions and the  
515 plates were read using Luminex® 200™ (Thermo Fisher) at Multiplex Core of Forsyth Institute.

## 516 **Statistics**

517 Data are presented as the mean  $\pm$  SEM. Survival curves were analyzed by log-rank (Mantel-cox)  
518 test. Statistical significance was evaluated using unpaired two-tailed Student's *t*-test for two-group  
519 comparison or ANOVA, followed by a Tukey-Kramer post-hoc, Bonferroni's post-hoc where  
520 appropriate. A P value of less than 0.05 was considered significant (\*).

521 **Proteomics Analysis.** Gel slices were submitted for mass-spectrometry analysis and protein  
522 identification, which were performed at the Taplin Mass Spectrometry Facility at Harvard Medical  
523 School as previously described (86)

524 **REFERENCES**

- 525 1. Pugliese A. Autoreactive T cells in type 1 diabetes. *J Clin Invest.* 2017;127(8):2881-91.
- 526 2. Patterson CC, Harjutsalo V, Rosenbauer J, Neu A, Cinek O, Skrivarhaug T, et al. Trends  
527 and cyclical variation in the incidence of childhood type 1 diabetes in 26 European centres  
528 in the 25 year period 1989-2013: a multicentre prospective registration study.  
529 *Diabetologia.* 2019;62(3):408-17.
- 530 3. Mayer-Davis EJ, Lawrence JM, Dabelea D, Divers J, Isom S, Dolan L, et al. Incidence  
531 Trends of Type 1 and Type 2 Diabetes among Youths, 2002-2012. *N Engl J Med.*  
532 2017;376(15):1419-29.
- 533 4. Kondrashova A, Reunanen A, Romanov A, Karvonen A, Viskari H, Vesikari T, et al. A  
534 six-fold gradient in the incidence of type 1 diabetes at the eastern border of Finland. *Ann*  
535 *Med.* 2005;37(1):67-72.
- 536 5. Redondo MJ, Jeffrey J, Fain PR, Eisenbarth GS, and Orban T. Concordance for islet  
537 autoimmunity among monozygotic twins. *N Engl J Med.* 2008;359(26):2849-50.
- 538 6. Zhao G, Vatanen T, Droit L, Park A, Kostic AD, Poon TW, et al. Intestinal virome changes  
539 precede autoimmunity in type I diabetes-susceptible children. *Proc Natl Acad Sci U S A.*  
540 2017;114(30):E6166-E75.
- 541 7. Op de Beeck A, and Eizirik DL. Viral infections in type 1 diabetes mellitus--why the beta  
542 cells? *Nat Rev Endocrinol.* 2016;12(5):263-73.
- 543 8. Christen U, Hintermann E, Holdener M, and von Herrath MG. Viral triggers for  
544 autoimmunity: is the 'glass of molecular mimicry' half full or half empty? *J Autoimmun.*  
545 2010;34(1):38-44.
- 546 9. Rewers M, and Ludvigsson J. Environmental risk factors for type 1 diabetes. *Lancet.*  
547 2016;387(10035):2340-8.
- 548 10. Davis-Richardson AG, Ardisson AN, Dias R, Simell V, Leonard MT, Kemppainen KM,  
549 et al. *Bacteroides dorei* dominates gut microbiome prior to autoimmunity in Finnish  
550 children at high risk for type 1 diabetes. *Frontiers in microbiology.* 2014;5:678.
- 551 11. Vatanen T, Franzosa EA, Schwager R, Tripathi S, Arthur TD, Vehik K, et al. The human  
552 gut microbiome in early-onset type 1 diabetes from the TEDDY study. *Nature.*  
553 2018;562(7728):589-94.

- 554 12. Kostic AD, Gevers D, Siljander H, Vatanen T, Hyotylainen T, Hamalainen AM, et al. The  
555 dynamics of the human infant gut microbiome in development and in progression toward  
556 type 1 diabetes. *Cell Host Microbe*. 2015;17(2):260-73.
- 557 13. Vatanen T, Kostic AD, d'Hennezel E, Siljander H, Franzosa EA, Yassour M, et al.  
558 Variation in Microbiome LPS Immunogenicity Contributes to Autoimmunity in Humans.  
559 *Cell*. 2016;165(4):842-53.
- 560 14. Dedrick S, Sundaresh B, Huang Q, Brady C, Yoo T, Cronin C, et al. The Role of Gut  
561 Microbiota and Environmental Factors in Type 1 Diabetes Pathogenesis. *Front Endocrinol*  
562 *(Lausanne)*. 2020;11:78.
- 563 15. Coppieters KT, Boettler T, and von Herrath M. Virus infections in type 1 diabetes. *Cold*  
564 *Spring Harb Perspect Med*. 2012;2(1):a007682.
- 565 16. Atkinson MA, Eisenbarth GS, and Michels AW. Type 1 diabetes. *Lancet*.  
566 2014;383(9911):69-82.
- 567 17. Peters L, Posgai A, and Brusko TM. Islet-immune interactions in type 1 diabetes: the nexus  
568 of beta cell destruction. *Clin Exp Immunol*. 2019;198(3):326-40.
- 569 18. Zhang L, Nakayama M, and Eisenbarth GS. Insulin as an autoantigen in NOD/human  
570 diabetes. *Curr Opin Immunol*. 2008;20(1):111-8.
- 571 19. Alleva DG, Crowe PD, Jin L, Kwok WW, Ling N, Gottschalk M, et al. A disease-  
572 associated cellular immune response in type 1 diabetics to an immunodominant epitope of  
573 insulin. *J Clin Invest*. 2001;107(2):173-80.
- 574 20. Palmer JP, Asplin CM, Clemons P, Lyen K, Tatpati O, Raghu PK, et al. Insulin antibodies  
575 in insulin-dependent diabetics before insulin treatment. *Science*. 1983;222(4630):1337-9.
- 576 21. Steck AK, Johnson K, Barriga KJ, Miao D, Yu L, Hutton JC, et al. Age of islet  
577 autoantibody appearance and mean levels of insulin, but not GAD or IA-2 autoantibodies,  
578 predict age of diagnosis of type 1 diabetes: diabetes autoimmunity study in the young.  
579 *Diabetes Care*. 2011;34(6):1397-9.
- 580 22. Unanue ER. Antigen presentation in the autoimmune diabetes of the NOD mouse. *Annu*  
581 *Rev Immunol*. 2014;32:579-608.
- 582 23. Daniel D, Gill RG, Schloot N, and Wegmann D. Epitope specificity, cytokine production  
583 profile and diabetogenic activity of insulin-specific T cell clones isolated from NOD mice.  
584 *Eur J Immunol*. 1995;25(4):1056-62.

- 585 24. Pathiraja V, Kuehlich JP, Campbell PD, Krishnamurthy B, Loudovaris T, Coates PT, et al.  
586 Proinsulin-specific, HLA-DQ8, and HLA-DQ8-transdimer-restricted CD4+ T cells  
587 infiltrate islets in type 1 diabetes. *Diabetes*. 2015;64(1):172-82.
- 588 25. Michels AW, Landry LG, McDaniel KA, Yu L, Campbell-Thompson M, Kwok WW, et  
589 al. Islet-Derived CD4 T Cells Targeting Proinsulin in Human Autoimmune Diabetes.  
590 *Diabetes*. 2017;66(3):722-34.
- 591 26. Nakayama M, McDaniel K, Fitzgerald-Miller L, Kiekhoefer C, Snell-Bergeon JK,  
592 Davidson HW, et al. Regulatory vs. inflammatory cytokine T-cell responses to mutated  
593 insulin peptides in healthy and type 1 diabetic subjects. *Proc Natl Acad Sci U S A*.  
594 2015;112(14):4429-34.
- 595 27. Yang J, Chow IT, Sosinowski T, Torres-Chinn N, Greenbaum CJ, James EA, et al.  
596 Autoreactive T cells specific for insulin B:11-23 recognize a low-affinity peptide register  
597 in human subjects with autoimmune diabetes. *Proc Natl Acad Sci U S A*.  
598 2014;111(41):14840-5.
- 599 28. Cusick MF, Libbey JE, and Fujinami RS. Molecular mimicry as a mechanism of  
600 autoimmune disease. *Clin Rev Allergy Immunol*. 2012;42(1):102-11.
- 601 29. Wan X, Zinselmeyer BH, Zakharov PN, Vomund AN, Taniguchi R, Santambrogio L, et  
602 al. Pancreatic islets communicate with lymphoid tissues via exocytosis of insulin peptides.  
603 *Nature*. 2018;560(7716):107-11.
- 604 30. Sakamoto M, and Benno Y. Reclassification of *Bacteroides distasonis*, *Bacteroides*  
605 *goldsteinii* and *Bacteroides merdae* as *Parabacteroides distasonis* gen. nov., comb. nov.,  
606 *Parabacteroides goldsteinii* comb. nov. and *Parabacteroides merdae* comb. nov. *Int J Syst*  
607 *Evol Microbiol*. 2006;56(Pt 7):1599-605.
- 608 31. Abuaita BH, and Withey JH. Bicarbonate Induces *Vibrio cholerae* virulence gene  
609 expression by enhancing ToxT activity. *Infect Immun*. 2009;77(9):4111-20.
- 610 32. Stadinski BD, Zhang L, Crawford F, Marrack P, Eisenbarth GS, and Kappler JW.  
611 Diabetogenic T cells recognize insulin bound to IAg7 in an unexpected, weakly binding  
612 register. *Proc Natl Acad Sci U S A*. 2010;107(24):10978-83.
- 613 33. Sofi MH, Johnson BM, Gudi RR, Jolly A, Gaudreau MC, and Vasu C. Polysaccharide A-  
614 Dependent Opposing Effects of Mucosal and Systemic Exposures to Human Gut  
615 Commensal *Bacteroides fragilis* in Type 1 Diabetes. *Diabetes*. 2019;68(10):1975-89.

- 616 34. Fuchtenbusch M, Larger E, Thebault K, and Boitard C. Transfer of diabetes from  
617 prediabetic NOD mice to NOD-SCID/SCID mice: association with pancreatic insulin  
618 content. *Horm Metab Res.* 2005;37(2):63-7.
- 619 35. Devendra D, Paronen J, Moriyama H, Miao D, Eisenbarth GS, and Liu E. Differential  
620 immune response to B:9-23 insulin 1 and insulin 2 peptides in animal models of type 1  
621 diabetes. *J Autoimmun.* 2004;23(1):17-26.
- 622 36. Endesfelder D, zu Castell W, Ardisson A, Davis-Richardson AG, Achenbach P, Hagen  
623 M, et al. Compromised gut microbiota networks in children with anti-islet cell  
624 autoimmunity. *Diabetes.* 2014;63(6):2006-14.
- 625 37. Mason D. A very high level of crossreactivity is an essential feature of the T-cell receptor.  
626 *Immunol Today.* 1998;19(9):395-404.
- 627 38. Calis JJ, de Boer RJ, and Kesmir C. Degenerate T-cell recognition of peptides on MHC  
628 molecules creates large holes in the T-cell repertoire. *PLoS Comput Biol.*  
629 2012;8(3):e1002412.
- 630 39. Wucherpfennig KW, and Strominger JL. Molecular mimicry in T cell-mediated  
631 autoimmunity: viral peptides activate human T cell clones specific for myelin basic protein.  
632 *Cell.* 1995;80(5):695-705.
- 633 40. Mana P, Goodyear M, Bernard C, Tomioka R, Freire-Garabal M, and Linares D. Tolerance  
634 induction by molecular mimicry: prevention and suppression of experimental autoimmune  
635 encephalomyelitis with the milk protein butyrophilin. *Int Immunol.* 2004;16(3):489-99.
- 636 41. Atkinson MA, Bowman MA, Campbell L, Darrow BL, Kaufman DL, and Maclaren NK.  
637 Cellular immunity to a determinant common to glutamate decarboxylase and coxsackie  
638 virus in insulin-dependent diabetes. *J Clin Invest.* 1994;94(5):2125-9.
- 639 42. Schloot NC, Willemsen SJ, Duinkerken G, Drijfhout JW, de Vries RR, and Roep BO.  
640 Molecular mimicry in type 1 diabetes mellitus revisited: T-cell clones to GAD65 peptides  
641 with sequence homology to Coxsackie or proinsulin peptides do not crossreact with  
642 homologous counterpart. *Hum Immunol.* 2001;62(4):299-309.
- 643 43. Tian J, Lehmann PV, and Kaufman DL. T cell cross-reactivity between coxsackievirus and  
644 glutamate decarboxylase is associated with a murine diabetes susceptibility allele. *J Exp*  
645 *Med.* 1994;180(5):1979-84.

- 646 44. Honeyman MC, Stone NL, Falk BA, Nepom G, and Harrison LC. Evidence for molecular  
647 mimicry between human T cell epitopes in rotavirus and pancreatic islet autoantigens. *J*  
648 *Immunol.* 2010;184(4):2204-10.
- 649 45. Maruvada P, Leone V, Kaplan LM, and Chang EB. The Human Microbiome and Obesity:  
650 Moving beyond Associations. *Cell Host Microbe.* 2017;22(5):589-99.
- 651 46. Rinaldi M, Perricone R, Blank M, Perricone C, and Shoenfeld Y. Anti-Saccharomyces  
652 cerevisiae autoantibodies in autoimmune diseases: from bread baking to autoimmunity.  
653 *Clin Rev Allergy Immunol.* 2013;45(2):152-61.
- 654 47. Gevers D, Kugathasan S, Denson LA, Vazquez-Baeza Y, Van Treuren W, Ren B, et al.  
655 The treatment-naive microbiome in new-onset Crohn's disease. *Cell Host Microbe.*  
656 2014;15(3):382-92.
- 657 48. Lamps LW, Madhusudhan KT, Havens JM, Greenson JK, Bronner MP, Chiles MC, et al.  
658 Pathogenic Yersinia DNA is detected in bowel and mesenteric lymph nodes from patients  
659 with Crohn's disease. *The American journal of surgical pathology.* 2003;27(2):220-7.
- 660 49. Chassaing B, Rolhion N, de Vallee A, Salim SY, Prorok-Hamon M, Neut C, et al. Crohn  
661 disease--associated adherent-invasive E. coli bacteria target mouse and human Peyer's  
662 patches via long polar fimbriae. *J Clin Invest.* 2011;121(3):966-75.
- 663 50. Carding S, Verbeke K, Vipond DT, Corfe BM, and Owen LJ. Dysbiosis of the gut  
664 microbiota in disease. *Microb Ecol Health Dis.* 2015;26:26191.
- 665 51. Frank DN, St Amand AL, Feldman RA, Boedeker EC, Harpaz N, and Pace NR. Molecular-  
666 phylogenetic characterization of microbial community imbalances in human inflammatory  
667 bowel diseases. *Proc Natl Acad Sci U S A.* 2007;104(34):13780-5.
- 668 52. Navaneethan U, Venkatesh PG, and Shen B. Clostridium difficile infection and  
669 inflammatory bowel disease: understanding the evolving relationship. *World J*  
670 *Gastroenterol.* 2010;16(39):4892-904.
- 671 53. Quagliariello A, Aloisio I, Bozzi Cionci N, Luiselli D, D'Auria G, Martinez-Priego L, et  
672 al. Effect of Bifidobacterium breve on the Intestinal Microbiota of Coeliac Children on a  
673 Gluten Free Diet: A Pilot Study. *Nutrients.* 2016;8(10).
- 674 54. Heintz-Buschart A, May P, Laczny CC, Lebrun LA, Bellora C, Krishna A, et al. Integrated  
675 multi-omics of the human gut microbiome in a case study of familial type 1 diabetes. *Nat*  
676 *Microbiol.* 2016;2:16180.

- 677 55. Stewart CJ, Ajami NJ, O'Brien JL, Hutchinson DS, Smith DP, Wong MC, et al. Temporal  
678 development of the gut microbiome in early childhood from the TEDDY study. *Nature*.  
679 2018;562(7728):583-8.
- 680 56. Lathrop SK, Bloom SM, Rao SM, Nutsch K, Lio CW, Santacruz N, et al. Peripheral  
681 education of the immune system by colonic commensal microbiota. *Nature*.  
682 2011;478(7368):250-4.
- 683 57. Nakayama M, Abiru N, Moriyama H, Babaya N, Liu E, Miao D, et al. Prime role for an  
684 insulin epitope in the development of type 1 diabetes in NOD mice. *Nature*.  
685 2005;435(7039):220-3.
- 686 58. Higashide T, Kawamura T, Nagata M, Kotani R, Kimura K, Hirose M, et al. T cell epitope  
687 mapping study with insulin overlapping peptides using ELISPOT assay in Japanese  
688 children and adolescents with type 1 diabetes. *Pediatr Res*. 2006;59(3):445-50.
- 689 59. Kent SC, Chen Y, Bregoli L, Clemmings SM, Kenyon NS, Ricordi C, et al. Expanded T  
690 cells from pancreatic lymph nodes of type 1 diabetic subjects recognize an insulin epitope.  
691 *Nature*. 2005;435(7039):224-8.
- 692 60. Mannering SI, Harrison LC, Williamson NA, Morris JS, Thearle DJ, Jensen KP, et al. The  
693 insulin A-chain epitope recognized by human T cells is posttranslationally modified. *J Exp*  
694 *Med*. 2005;202(9):1191-7.
- 695 61. Mannering SI, Di Carluccio AR, and Elso CM. Neoepitopes: a new take on beta cell  
696 autoimmunity in type 1 diabetes. *Diabetologia*. 2019;62(3):351-6.
- 697 62. Purcell AW, Sechi S, and DiLorenzo TP. The Evolving Landscape of Autoantigen  
698 Discovery and Characterization in Type 1 Diabetes. *Diabetes*. 2019;68(5):879-86.
- 699 63. Delong T, Wiles TA, Baker RL, Bradley B, Barbour G, Reisdorph R, et al. Pathogenic  
700 CD4 T cells in type 1 diabetes recognize epitopes formed by peptide fusion. *Science*.  
701 2016;351(6274):711-4.
- 702 64. Kracht MJ, van Lummel M, Nikolic T, Joosten AM, Laban S, van der Slik AR, et al.  
703 Autoimmunity against a defective ribosomal insulin gene product in type 1 diabetes. *Nat*  
704 *Med*. 2017;23(4):501-7.
- 705 65. Babon JA, DeNicola ME, Blodgett DM, Crevecoeur I, Buttrick TS, Maehr R, et al.  
706 Analysis of self-antigen specificity of islet-infiltrating T cells from human donors with type  
707 1 diabetes. *Nat Med*. 2016;22(12):1482-7.



- 708 66. Tai N, Peng J, Liu F, Gulden E, Hu Y, Zhang X, et al. Microbial antigen mimics activate  
709 diabetogenic CD8 T cells in NOD mice. *J Exp Med*. 2016;213(10):2129-46.
- 710 67. Markle JG, Frank DN, Mortin-Toth S, Robertson CE, Feazel LM, Rolle-Kampczyk U, et  
711 al. Sex differences in the gut microbiome drive hormone-dependent regulation of  
712 autoimmunity. *Science*. 2013;339(6123):1084-8.
- 713 68. Kriegel MA, Sefik E, Hill JA, Wu HJ, Benoist C, and Mathis D. Naturally transmitted  
714 segmented filamentous bacteria segregate with diabetes protection in nonobese diabetic  
715 mice. *Proc Natl Acad Sci U S A*. 2011;108(28):11548-53.
- 716 69. Hanninen A, Toivonen R, Poysti S, Belzer C, Plovier H, Ouwerkerk JP, et al. *Akkermansia*  
717 *muciniphila* induces gut microbiota remodelling and controls islet autoimmunity in NOD  
718 mice. *Gut*. 2018;67(8):1445-53.
- 719 70. Song L, Xiong D, Song H, Wu L, Zhang M, Kang X, et al. Mucosal and Systemic Immune  
720 Responses to Influenza H7N9 Antigen HA1-2 Co-Delivered Intranasally with Flagellin or  
721 Polyethyleneimine in Mice and Chickens. *Front Immunol*. 2017;8:326.
- 722 71. Greiling TM, Dehner C, Chen X, Hughes K, Iniguez AJ, Boccitto M, et al. Commensal  
723 orthologs of the human autoantigen Ro60 as triggers of autoimmunity in lupus. *Sci Transl*  
724 *Med*. 2018;10(434).
- 725 72. Gil-Cruz C, Perez-Shibayama C, De Martin A, Ronchi F, van der Borgh K, Niederer R, et  
726 al. Microbiota-derived peptide mimics drive lethal inflammatory cardiomyopathy. *Science*.  
727 2019;366(6467):881-6.
- 728 73. Harkiolaki M, Holmes SL, Svendsen P, Gregersen JW, Jensen LT, McMahon R, et al. T  
729 cell-mediated autoimmune disease due to low-affinity crossreactivity to common microbial  
730 peptides. *Immunity*. 2009;30(3):348-57.
- 731 74. Chow IT, Gates TJ, Papadopoulos GK, Moustakas AK, Kolawole EM, Notturmo RJ, et al.  
732 Discriminative T cell recognition of cross-reactive islet-antigens is associated with HLA-  
733 DQ8 transdimer-mediated autoimmune diabetes. *Sci Adv*. 2019;5(8):eaaw9336.
- 734 75. Kim Y, Ponomarenko J, Zhu Z, Tamang D, Wang P, Greenbaum J, et al. Immune epitope  
735 database analysis resource. *Nucleic Acids Res*. 2012;40(Web Server issue):W525-30.
- 736 76. Nielsen M, Lundegaard C, Worning P, Lauemoller SL, Lamberth K, Buus S, et al. Reliable  
737 prediction of T-cell epitopes using neural networks with novel sequence representations.  
738 *Protein Sci*. 2003;12(5):1007-17.



- 739 77. Lundegaard C, Lamberth K, Harndahl M, Buus S, Lund O, and Nielsen M. NetMHC-3.0:  
740 accurate web accessible predictions of human, mouse and monkey MHC class I affinities  
741 for peptides of length 8-11. *Nucleic Acids Res.* 2008;36(Web Server issue):W509-12.
- 742 78. Andreatta M, and Nielsen M. Gapped sequence alignment using artificial neural networks:  
743 application to the MHC class I system. *Bioinformatics.* 2016;32(4):511-7.
- 744 79. Peters B, and Sette A. Generating quantitative models describing the sequence specificity  
745 of biological processes with the stabilized matrix method. *BMC Bioinformatics.*  
746 2005;6:132.
- 747 80. Sidney J, Assarsson E, Moore C, Ngo S, Pinilla C, Sette A, et al. Quantitative peptide  
748 binding motifs for 19 human and mouse MHC class I molecules derived using positional  
749 scanning combinatorial peptide libraries. *Immunome Res.* 2008;4:2.
- 750 81. Mohan JF, Levisetti MG, Calderon B, Herzog JW, Petzold SJ, and Unanue ER. Unique  
751 autoreactive T cells recognize insulin peptides generated within the islets of Langerhans in  
752 autoimmune diabetes. *Nat Immunol.* 2010;11(4):350-4.
- 753 82. Dziarski R, Park SY, Kashyap DR, Dowd SE, and Gupta D. Pglyrp-Regulated Gut  
754 Microflora *Prevotella falsenii*, *Parabacteroides distasonis* and *Bacteroides eggerthii*  
755 Enhance and *Alistipes finegoldii* Attenuates Colitis in Mice. *PLoS One.*  
756 2016;11(1):e0146162.
- 757 83. Crosswell A, Amir E, Tegatz P, Barman M, and Salzman NH. Prolonged impact of  
758 antibiotics on intestinal microbial ecology and susceptibility to enteric *Salmonella*  
759 infection. *Infect Immun.* 2009;77(7):2741-53.
- 760 84. Srivastava S, Singh V, Kumar V, Verma PC, Srivastava R, Basu V, et al. Identification of  
761 regulatory elements in 16S rRNA gene of *Acinetobacter* species isolated from water  
762 sample. *Bioinformation.* 2008;3(4):173-6.
- 763 85. Flodstrom-Tullberg M, Yadav D, Hagerkvist R, Tsai D, Secret P, Stotland A, et al. Target  
764 cell expression of suppressor of cytokine signaling-1 prevents diabetes in the NOD mouse.  
765 *Diabetes.* 2003;52(11):2696-700.
- 766 86. Pollock N, Dhiman R, Daifalla N, Farhat M, and Campos-Neto A. Discovery of a unique  
767 *Mycobacterium tuberculosis* protein through proteomic analysis of urine from patients with  
768 active tuberculosis. *Microbes Infect.* 2018;20(4):228-35.

769

770 **Acknowledgements**

771 We first want to thank Prof. Emil Unanue and Dr. Anthony Vomund (University of Washington,  
772 St. Louis) for testing microbial insulins on T cell hybridomas, immunization experiments and with  
773 their help to interpret the data. Thanks to Jonathan.Dreyfuss and Hui Pan (Joslin Bioinformatics  
774 Core) for bioinformatics analysis. Thanks to Babak Momeni (Boston College) for sharing his  
775 laboratory's anaerobic chamber. We acknowledge BC Biology Department undergraduate  
776 students Tu Tran, Ruixu Huang with the microscopy work and David Kim and Scott Hsu for their  
777 help with the animal experiments. We thank to Alex Kostic, Tao Xu, Thomas Serwold and Shio  
778 Kobayashi (Joslin Diabetes Center) for the useful Discussion. Thanks to Annette Ziegler and  
779 David Endesfelder for providing the BABYDIET 16S sequencing data for reanalysis. Thanks to  
780 Amanda Posgai for editing the manuscript.

781 **Funding:** This work was supported by National Institutes of Health Grants 1K01DK117967-01  
782 (to E.A.) and R01DK031026 and R01DK033201 (to C.R.K.) and NIH P01 AI042288 to MAA.  
783 E.A. was supported by The G. Harold and Leila Y. Mathers Charitable Foundation Research Grant  
784 and an Iacocca Family Foundation Fellowship.

785 **Author contributions:** Q.H assisted with all NOD mice experiments including peptide  
786 immunization, oral gavage, splenocyte transfer and ELISA/Luminex experiments, qPCR and  
787 Western blot analysis using human and mice plasma. A.V and E.U assisted with the experiments  
788 using NOD mice T-cell hybridomas. I.C and W.K assisted with the experiments using NOD mice  
789 T-cell clones. C.B and A.R assisted with the peptide immunization and oral gavage experiments.  
790 D.O and D.L assisted with MHC-binding models. M.A provided the human plasma samples. E.A

791 completed bioinformatics analysis. E.A and C.R.K designed the research. All authors assisted with  
792 the analysis of the data. E.A supervised the project and wrote the paper.

793 **Competing Interests:** The authors do not have any conflict of interest related to this study.

794 **Data and materials availability:** Because the reads were not ideal for a peptide search, we first  
795 assembled the reads using SPAdes (11) and they are available at <https://github.com/ablab/spades>.

796 **FIGURES**

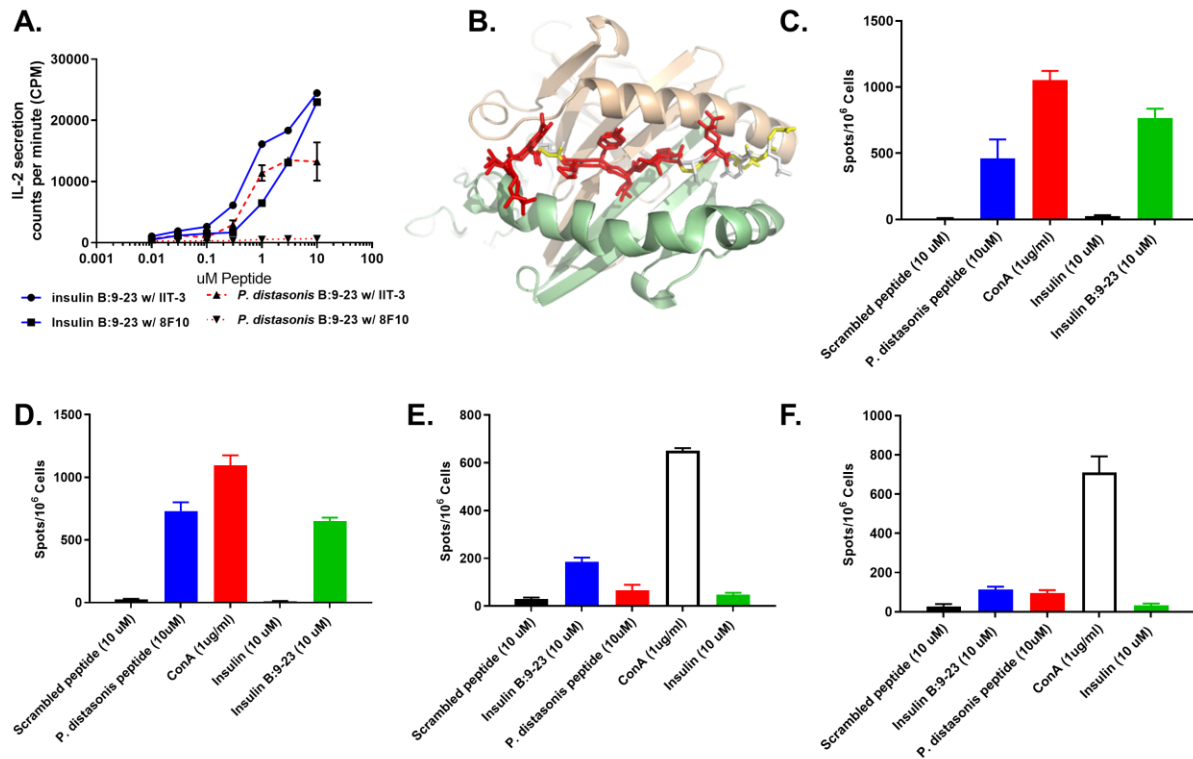

797

798 **Figure 1. *P. distasonis* insB:9-23 peptide can stimulate insB:13-21 specific NOD mice T cell**  
 799 **hybridomas and structurally mimic the epitope. (A)** CD4<sup>+</sup> T cells recognize *P. distasonis*  
 800 peptide. Response of the B:13–21-specific IIT-3 hybridomas (red) and B:12–20-specific 8F10  
 801 (blue) to insulin B9-23 or *P. distasonis* peptides covalently linked to I-A<sup>g7</sup> expressed on  
 802 macrophages. **(B)** Binding model for *P. distasonis* mimic peptide compared to insB9-23. In 3B,  
 803 I-A<sup>g7</sup> α-chain in tan, I-A<sup>g7</sup> β-chain in green. insB:9-23 peptide shown as yellow sticks, *P. distasonis*  
 804 peptide shown as white sticks. Red sticks and spheres show positions identical in *P. distasonis*  
 805 peptide and insB:9-23 peptide. **(C-F)** Mice (n=2/group) were immunized with either insB:9-23  
 806 peptide **(C-E)** or *P. distasonis* peptide **(D-F)** and draining lymph nodes were removed and pooled  
 807 after 7 days. Cells were stimulated either by *P. distasonis* peptide, insB:9-23, insulin, ConA  
 808 (positive control) or scrambled peptide (negative control). Secretion of IL-2 **(C-D)** and interferon  
 809 gamma **(E-F)** were determined by EliSPOT.

810

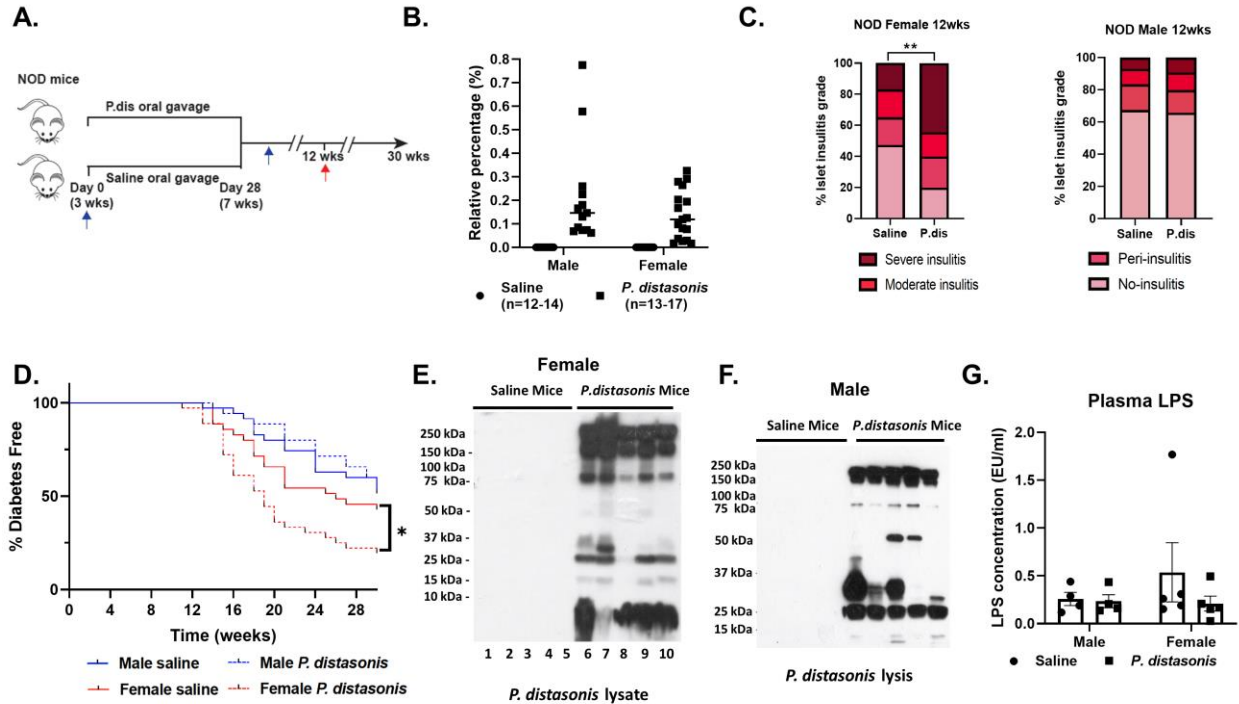

811

812 **Figure 2. *P. distasonis* colonization enhances disease onset in female NOD mice.** (A)  
 813 Schematic overview of the *P. distasonis* oral gavage experiments (n=40/group/sex). Blue arrow  
 814 shows fecal sample collection for qPCR experiments and red arrow shows when 5 mice were  
 815 removed from each group (week 12). (B) Relative abundance of *P. distasonis* in fecal samples  
 816 determined by qPCR (week 12, n=12-14/male, n=13-17/female). (C) Insulinitis scores obtained from  
 817 mice at week 12 (n=5/group/sex). (D) Diabetes incidence in NOD mice (n=35/group/sex) after  
 818 daily saline or *P. distasonis* oral gavage for 30 days after weaning ( $P<0.05$ ). (E-F) Western blot  
 819 analysis using plasma samples from (E) female and (F) male mice either oral gavigated with *P.*  
 820 *distasonis* or saline (week 12, n=5/group/sex). (G) Plasma LPS levels (week 12, n=5/group/sex).

821

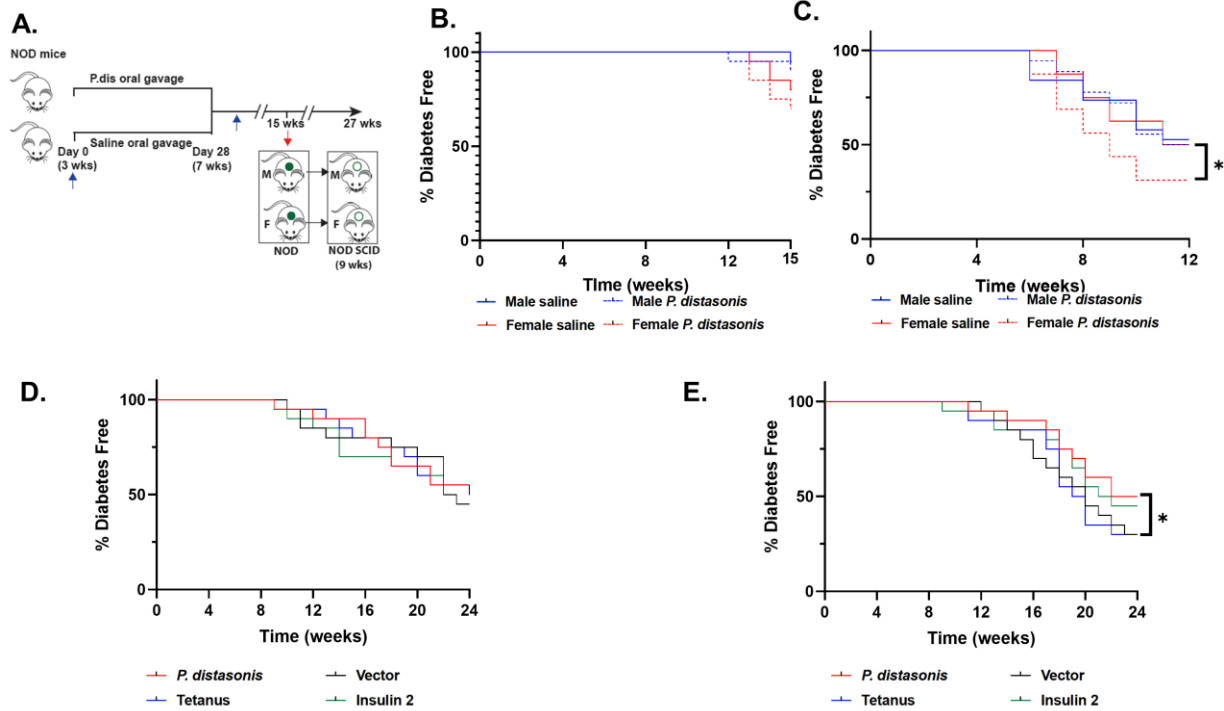

822

823 **Figure 3. Adoptive transfer accelerated diabetes in female NOD.SCID mice.** (A) Schematic  
 824 overview of the adoptive transfer experiments from NOD mice to NOD.SCID mice.  $5 \times 10^7$   
 825 splenocytes/mouse were transferred from individual NOD mice to NOD.SCID mice at 6 weeks of  
 826 age (1:1 ratio, same gender, n=16-20). (B) Diabetes incidence of donor NOD mice until adoptive  
 827 transfer (n=20). (C) Diabetes incidence of the recipient NOD.SCID mice after adoptive transfer  
 828 (n=16-20) ( $P < 0.05$ ). (D-E) Diabetes incidence of (D) male and (E) female mice (n=20/group/sex)  
 829 immunized with either *P. distasonis* peptide or ins2:B:9-23 peptide or Tetanus toxin peptide or  
 830 vector ( $P < 0.05$ ). Data are mean  $\pm$  SEM. Survival curves were analyzed by log-rank (Mantel-cox)  
 831 test.

832

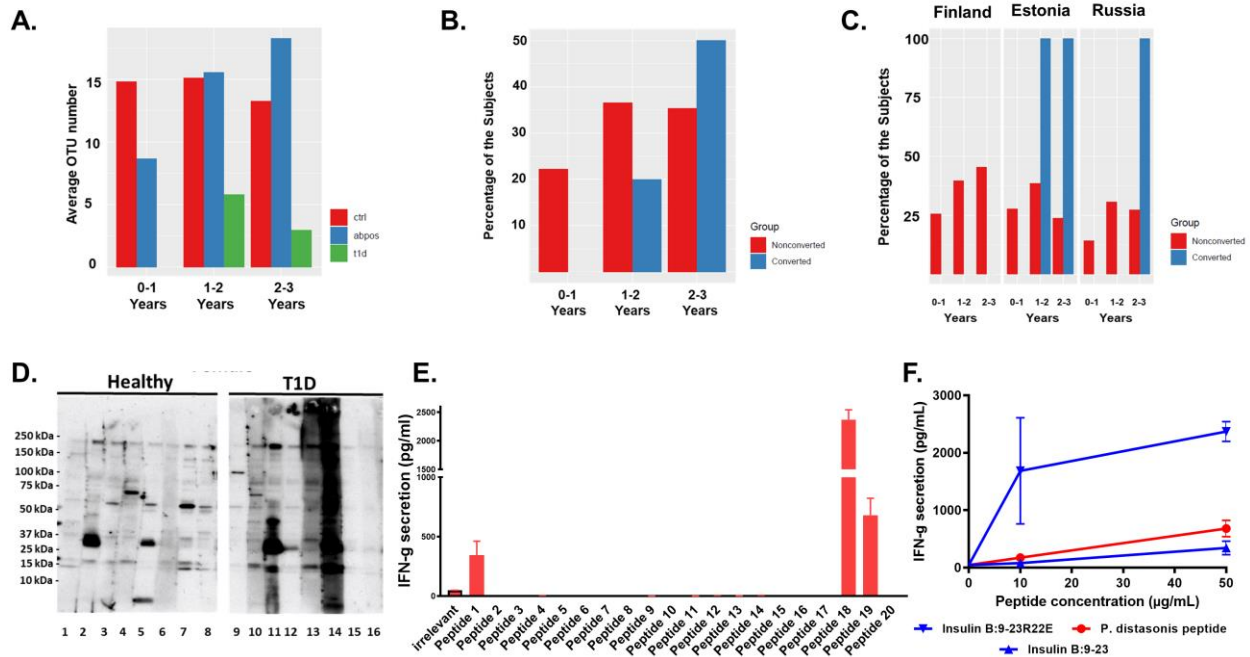

833

834 **Figure 4. Reanalysis of BABYDIET and DIABIMMUNE metagenome data for *P. distasonis***  
 835 **peptide and identification of *P. distasonis* specific immune response in humans. (A)**  
 836 **BABYDIET data was analyzed for the presence of *P. distasonis* OTUs in three different groups,**  
 837 **control, antibody-positive and T1D. (B-C) Reanalysis of DIABIMMUNE metagenome data for**  
 838 **the presence of *P. distasonis* ins9:23 like peptide (B) in all three countries and (C) in individual**  
 839 **countries. (D) Insulin B: 11-23-specific human T-cell clones were stimulated with each of selected**  
 840 **17 microbial peptides or 2 negative control (irrelevant and 20) peptides or 2 positive control (18-**  
 841 **19) (peptide concentration, 2.5 µM) and IFN-γ secretion was measured ( $P < 0.05$ ). The**  
 842 **corresponding peptides for the numbers are listed in Table 1. (E) *P. distasonis* peptide produced a**  
 843 **dose response in stimulating IFN-γ secretion. B:9-23 and B:9-23R22E are positive controls of the**  
 844 **experiment. (F) Western blot analysis using plasma samples obtained from eight female subjects**  
 845 **with T1D or eight healthy female subjects against *P. distasonis* lysate. Data are mean ± SEM.**  
 846 **Survival curves were analyzed by log-rank (Mantel-cox) test.**

847



848 **Table 1. The sequences of the microbial mimics of the insB:9-23 tested in this study. Red**  
 849 **indicate identical residues.**

| No | Classification            | Source                                     | B:9-23 like peptides    | Identity |
|----|---------------------------|--------------------------------------------|-------------------------|----------|
| 1  | <b>Positive</b>           | Human insulin B:9-23 peptide               | <b>SHLVEALYLVCGERG</b>  | Control  |
| 2  | <b>Control</b>            | Hyperactive peptide                        | <b>SHLVEALYLVCGEEG</b>  | Control  |
| 3  | <b>Human Gut</b>          | <i>Parabacteroides distasonis</i> 33B      | <b>RILVELLYLVCS EYL</b> | 9 of 15  |
| 4  | <b>Microbiome</b>         | <i>Bacteroides</i> sp. CAG:144             | <b>LDFKEALYLGCGDRT</b>  | 8 of 15  |
| 5  |                           | <i>Ruminococcus gnavus</i> CAG:126         | <b>DPRRSALYLFCKRC</b>   | 7 of 15  |
| 6  |                           | <i>Coprococcus eutactus</i>                | <b>NHDKEALYIYCD ETE</b> | 7 of 15  |
| 7  |                           | <i>Clostridiales</i> bacterium VE202-14    | <b>VRAGYALFLVCDEEK</b>  | 7 of 15  |
| 8  | <b>Human</b>              | <i>Corynebacterium genitalium</i>          | <b>FVHEDALHLVCGERI</b>  | 9 of 15  |
| 9  | <b>Genital Microbiome</b> | <i>Lactobacillus vaginalis</i>             | <b>LQSMEIPYLVCGERE</b>  | 8 of 15  |
| 10 | <b>Viruses</b>            | <i>Lymphocystis disease virus 1</i>        | <b>AHLVAALQRVCGNRG</b>  | 10 of 15 |
| 11 |                           | <i>Cyprinid herpesvirus 1</i>              | <b>SHPNVFIALVCGERG</b>  | 9 of 15  |
| 12 |                           | <i>Grouper iridovirus</i>                  | <b>GELIDALTEHCGDRG</b>  | 7 of 15  |
| 13 | <b>Human pathogen</b>     | <i>Burkholderia multivorans</i>            | <b>LHLARALYEMCGEFP</b>  | 8 of 15  |
| 14 | <b>Other microbes</b>     | <i>Bradyrhizobium japonicum</i> SEMIA 5079 | <b>VSGKHALYLYCGERG</b>  | 9 of 15  |
| 15 |                           | <i>Streptomyces griseus</i>                | <b>RDRVEALRLVCGEAM</b>  | 9 of 15  |
| 16 |                           | <i>Tetrasphaera japonica</i> T1-X7         | <b>HWLVEIAYLVCGDRR</b>  | 8 of 15  |
| 17 |                           | <i>Saccharomonospora halophila</i>         | <b>TAHGVAEYLVCGERR</b>  | 8 of 15  |
| 18 |                           | <i>Brevundimonas</i> sp. BAL3              | <b>WVGFE TLYLVCGERL</b> | 8 of 15  |
| 19 |                           | <i>Metarhizium robertsii</i>               | <b>DHWDEAGFLVCGERG</b>  | 10 of 15 |
| 20 | <b>Negative Control</b>   | Negative control peptide (random)          | <b>LELYARVGVSECHGL</b>  | Control  |

850

851



**A.**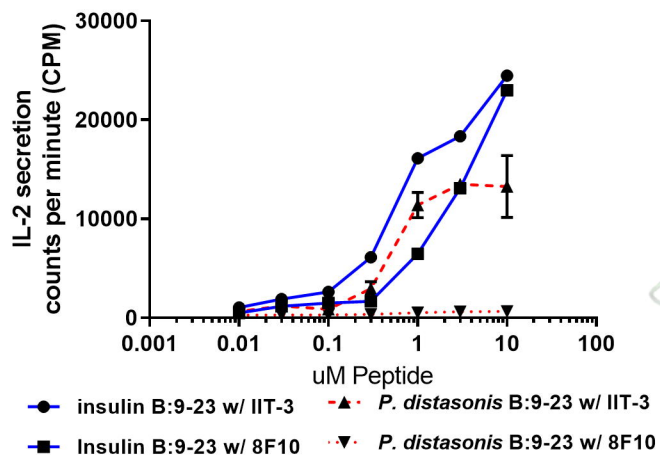**B.**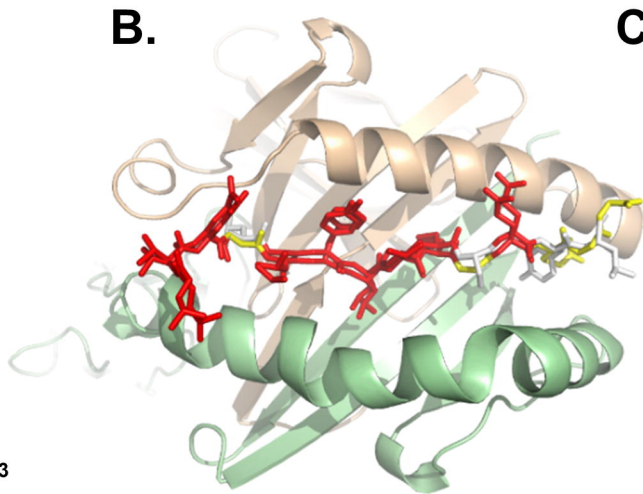**C.**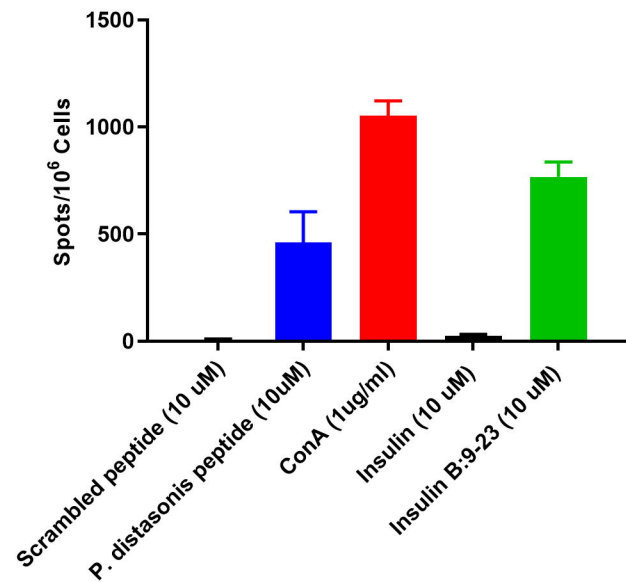**D.**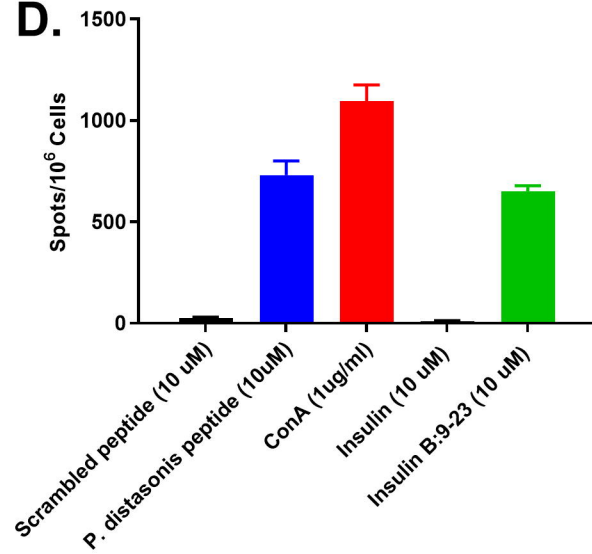**E.**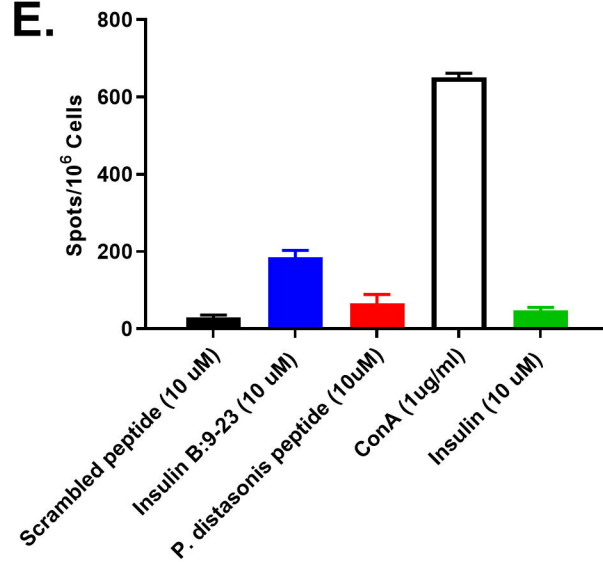**F.**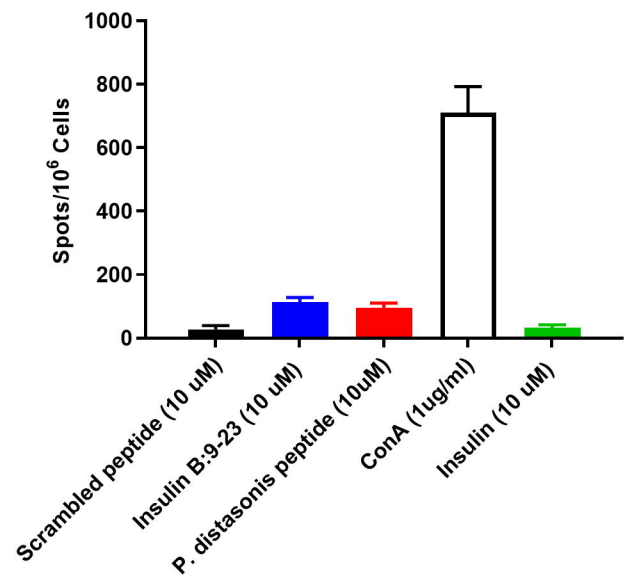

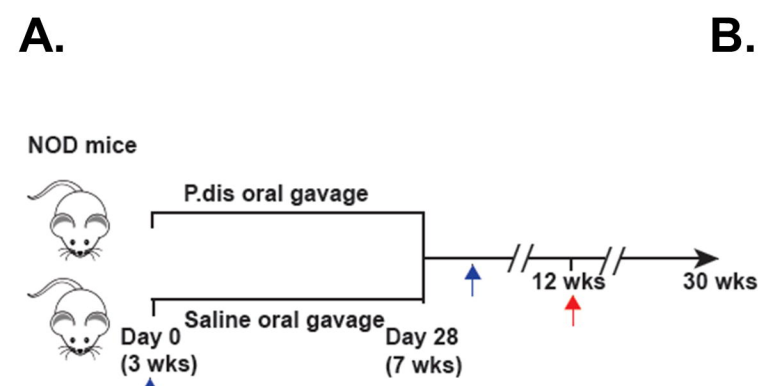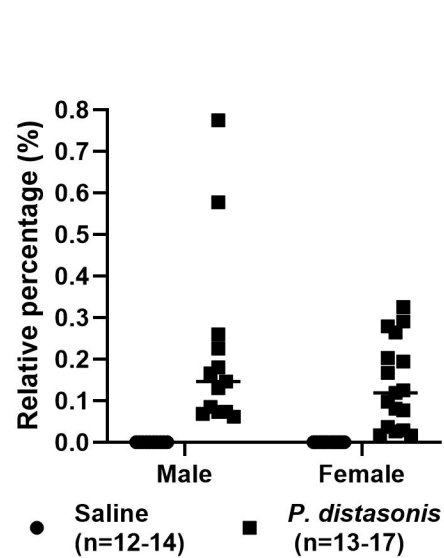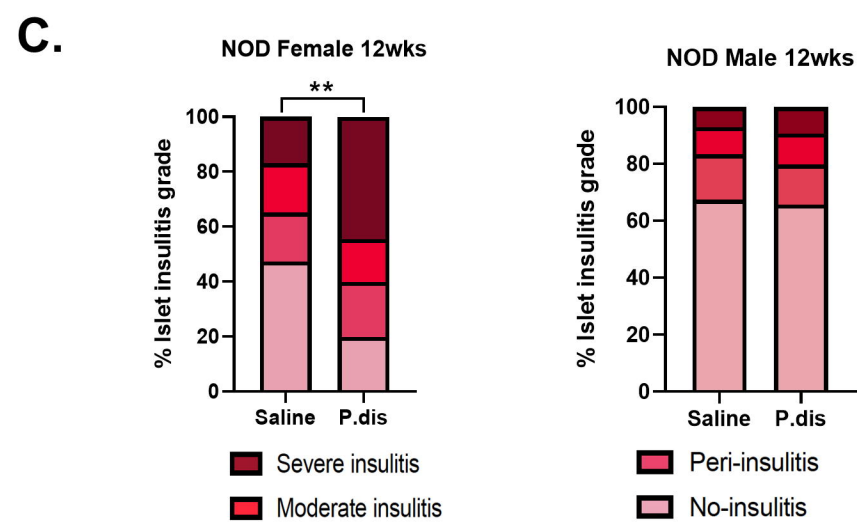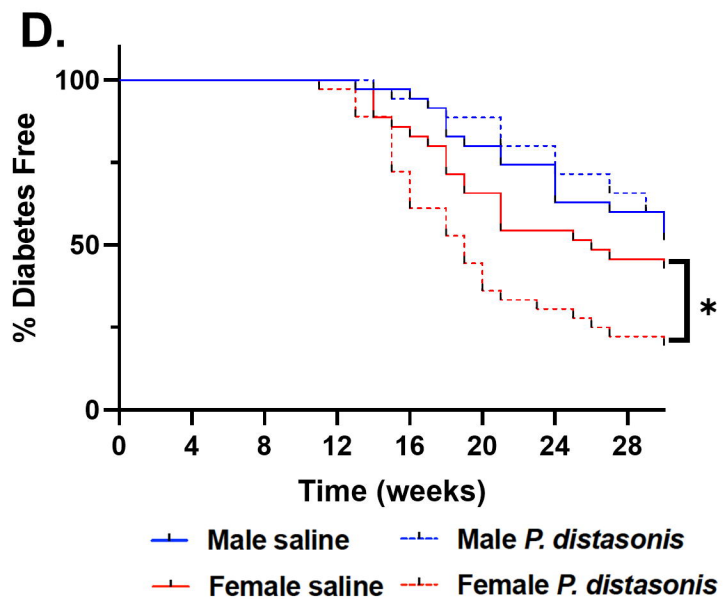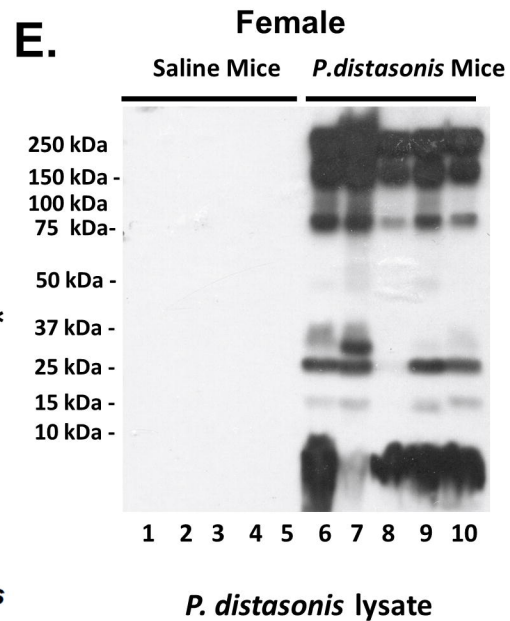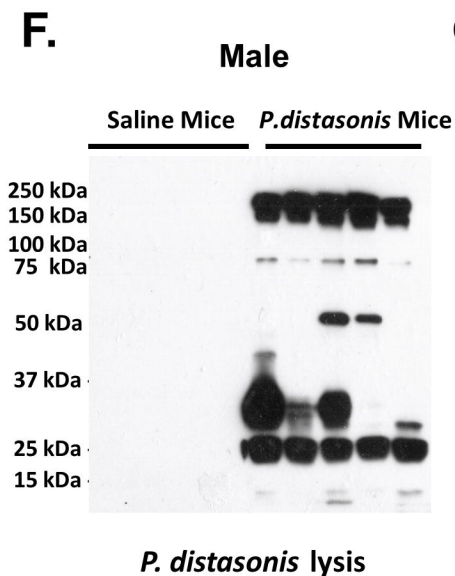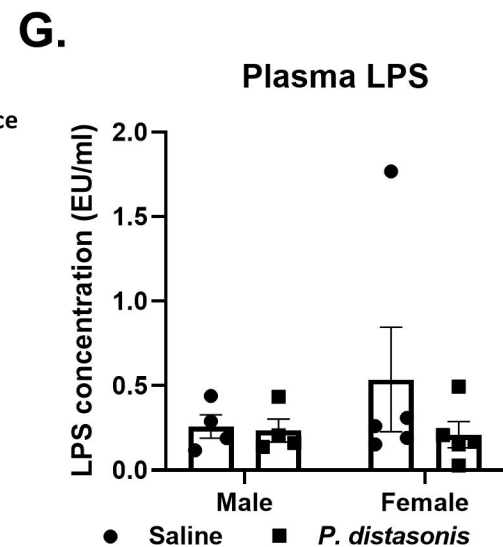

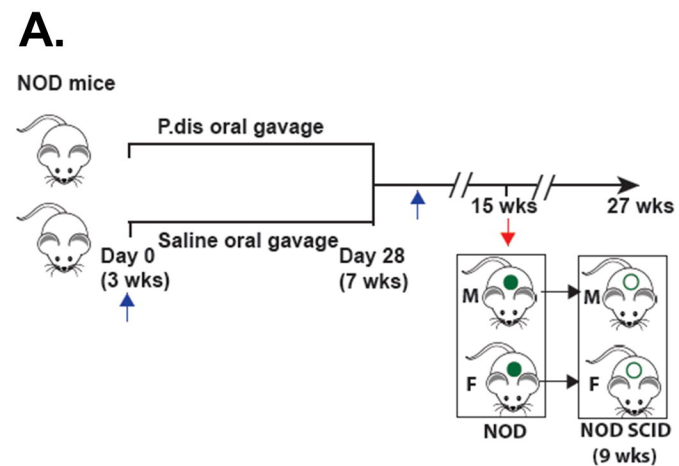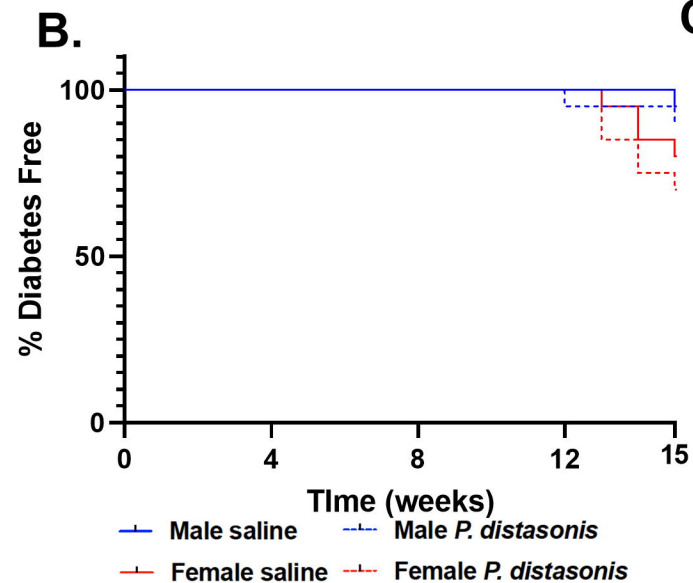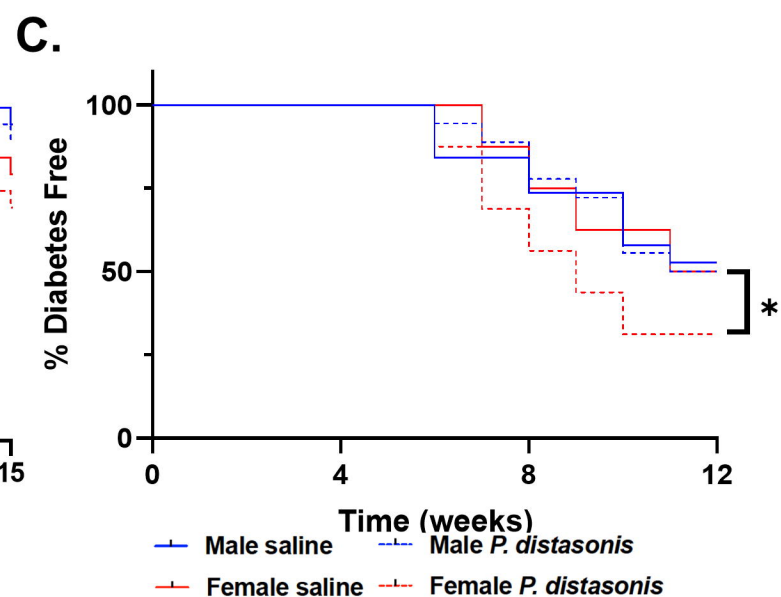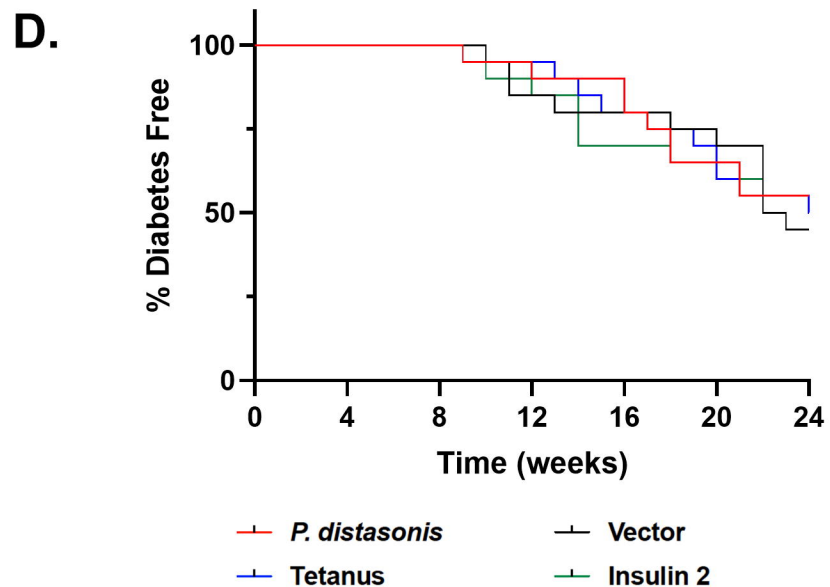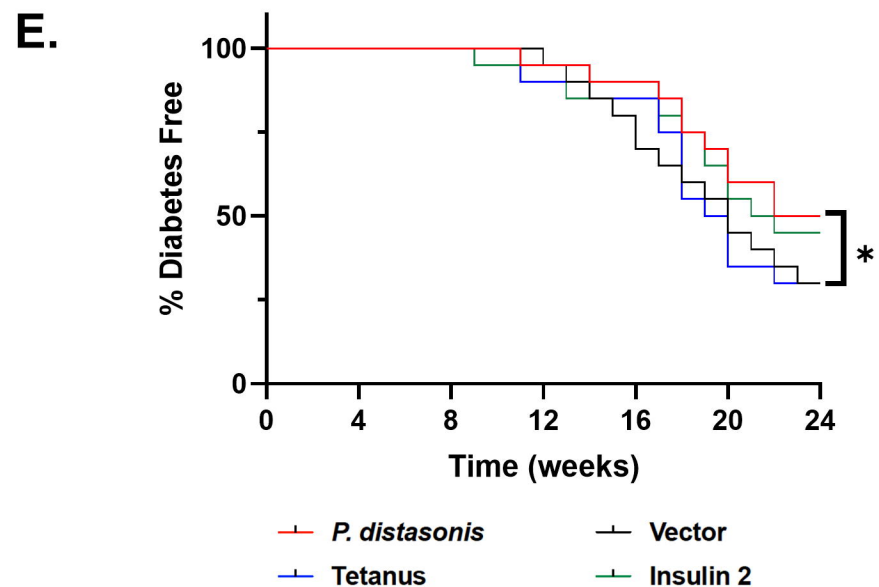

**A.**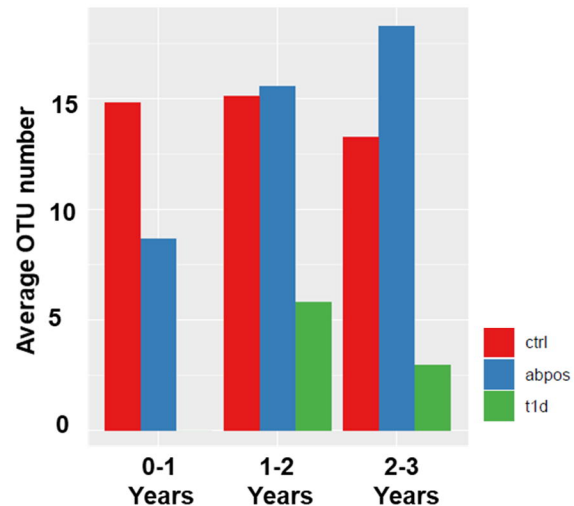**B.**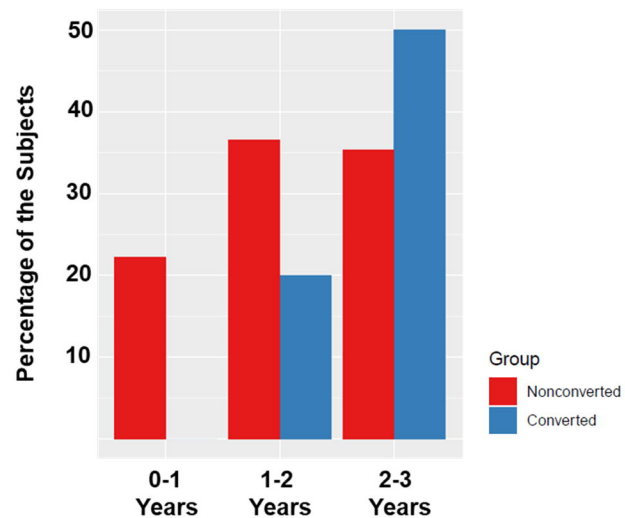**C.**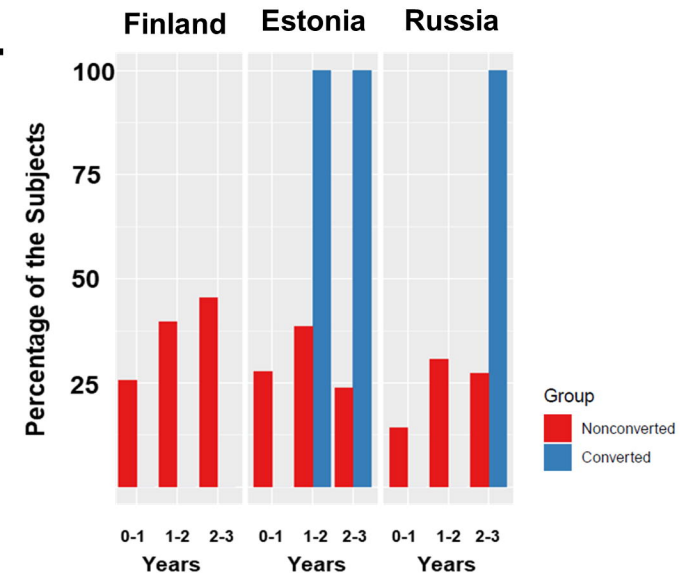**D.**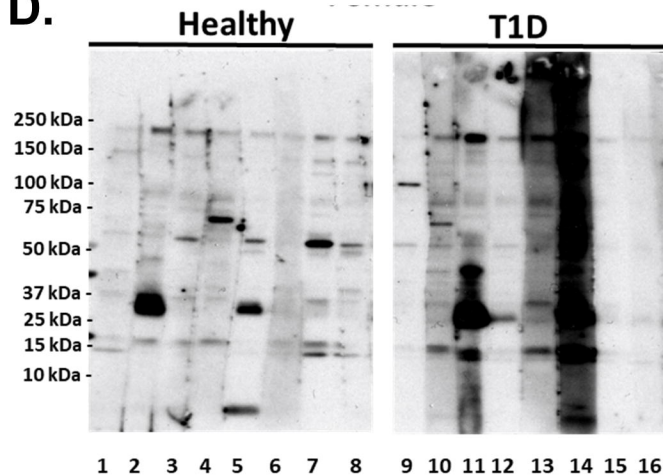**E.**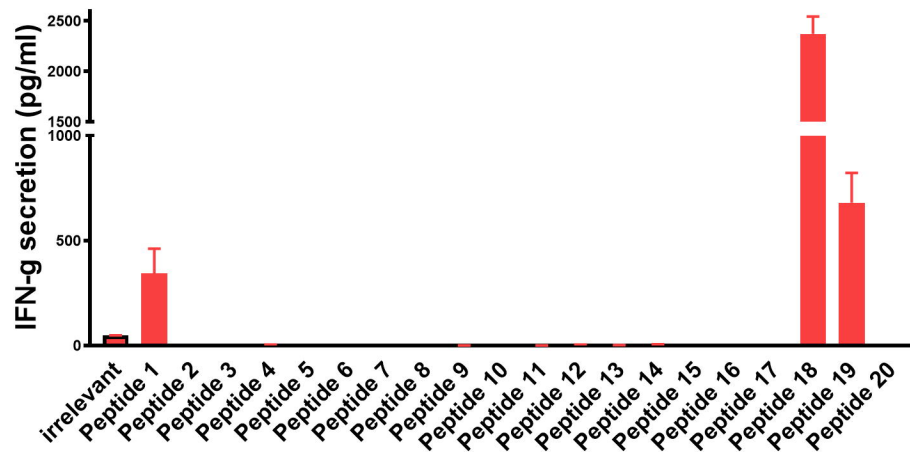**F.**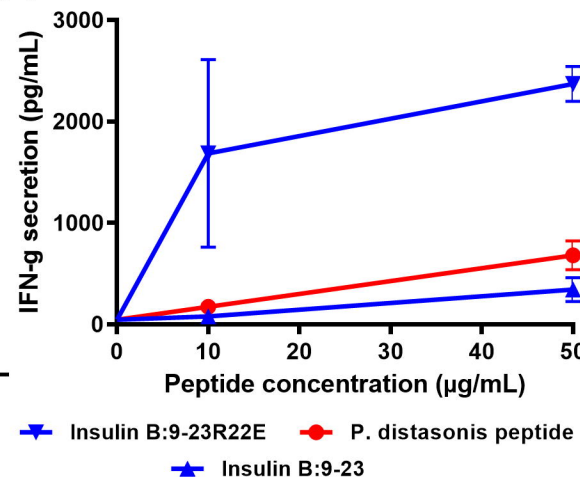

**A.****>EEY82194.1 hypoxanthine phosphoribosyltransferase [Bacteroides sp. 2\_1\_33B]**

MLNRILVELLYLVCSEYLNHNSRCLGFYSAYKCI TNFGMLLHFFVHRRKSCTFVPSKTERFMDRIRLKDKEFELFI PESDIQAAIAKMAVQIKADVEGKNPLFVGVNLNGAFMFVAELMRELDVPYELTFARYSSYQGTSSSTGILNEIMPVQADIRGRMVI LLEDI IDTGF'TMSYVMEKLRSEGAADVRLATMLFKPESLKCELT'PDYVGLQIPADFI VGHGLDYLDELGRSYKDIYKVVE

**>EEU50637.1 hypoxanthine phosphoribosyltransferase [Parabacteroides sp. D13]**

MLNRILVELLYLVCSEYLNHNSRCLGFYSAYKCI TNFGMLLHFFVHRRKSCTFVPSKTERFMDRIRLKDKEFELFI PESDIQAAIAKMAVQIKADVEGKNPLFVGVNLNGAFMFVAELMRELDVPYELTFARYSSYQGTSSSTGILNEIMPVQADICGRMVI LLEDI IDTGF'TMSYVMEKLRSEGAADVRLATMLFKPESLKCELT'PDYVGLQIPADFI VGHGLDYLDELGRSYKDIYKVVE

**B.**

BLAST » blastp suite » results for RID-KGBTWZ7014

Home Recent Results Saved Strategies Help

[< Edit Search](#) Save Search Search Summary

How to read this report? BLAST Help Videos Back to Traditional Results Page

Your search parameters were adjusted to search for a short input sequence.

**Job Title** Protein Sequence

**RID** KGBTWZ7014 Search expires on 08-17 02:53 am Download All

**Program** BLASTP Citation

**Database** nr See details

**Query ID** lcl|Query\_4691

**Description** None

**Molecule type** amino acid

**Query Length** 15

**Other reports** Distance tree of results Multiple alignment MSA viewer

**Filter Results**

**Organism** only top 20 will appear exclude

Type common name, binomial, taxid or group name

[+ Add organism](#)

**Percent Identity** to **E value** to **Query Coverage** to

[Filter](#) [Reset](#)

**Descriptions** Graphic Summary Alignments Taxonomy

**Sequences producing significant alignments** Download Manage Columns Show 100

select all 100 sequences selected

|                                     | Description                                                          | Max Score | Total Score | Query Cover | E value | Per. Ident | Accession      |
|-------------------------------------|----------------------------------------------------------------------|-----------|-------------|-------------|---------|------------|----------------|
| <input checked="" type="checkbox"/> | hypoxanthine phosphoribosyltransferase [Bacteroides sp. 2_1_33B]     | 52.8      | 52.8        | 100%        | 9e-07   | 100.00%    | EEY82194.1     |
| <input checked="" type="checkbox"/> | hypoxanthine phosphoribosyltransferase [Parabacteroides sp. D13]     | 52.8      | 52.8        | 100%        | 9e-07   | 100.00%    | EEU50637.1     |
| <input checked="" type="checkbox"/> | dedicator of cytokinesis protein 10 [Lynx pardinus]                  | 34.6      | 34.6        | 100%        | 2.5     | 73.33%     | VFV18325.1     |
| <input checked="" type="checkbox"/> | hypothetical protein [Senegalia massiliensis]                        | 34.1      | 34.1        | 66%         | 3.5     | 90.00%     | WP_160192078.1 |
| <input checked="" type="checkbox"/> | hypothetical protein [Senegalia massiliensis]                        | 34.1      | 34.1        | 66%         | 3.5     | 90.00%     | WP_130807101.1 |
| <input checked="" type="checkbox"/> | gap junction beta-5 protein [Rattus norvegicus]                      | 33.7      | 33.7        | 73%         | 4.9     | 78.57%     | NP_062114.1    |
| <input checked="" type="checkbox"/> | gap junction beta-5 protein [Rattus rattus]                          | 33.7      | 33.7        | 73%         | 4.9     | 78.57%     | XP_032744341.1 |
| <input checked="" type="checkbox"/> | LAFE_0C11760g1_1 [Lachanea fermental]                                | 33.3      | 33.3        | 86%         | 7.0     | 76.92%     | SCW00777.1     |
| <input checked="" type="checkbox"/> | LOW QUALITY PROTEIN: bromodomain-containing protein 8 [Papio anubis] | 33.3      | 33.3        | 73%         | 7.0     | 73.33%     | XP_031522687.1 |

**C.**

BLAST » blastp suite » results for RID-KGC4UURN014

Home Recent Results Saved Strategies Help

[< Edit Search](#) Save Search Search Summary

How to read this report? BLAST Help Videos Back to Traditional Results Page

**Job Title** EEU50637.1 hypoxanthine phosphoribosyltransferase...

**RID** KGC4UURN014 Search expires on 08-17 02:59 am Download All

**Program** BLASTP Citation

**Database** nr See details

**Query ID** lcl|Query\_79220

**Description** EEU50637.1 hypoxanthine phosphoribosyltransferase [Parabacteroides sp. D13]

**Molecule type** amino acid

**Query Length** 239

**Other reports** Distance tree of results Multiple alignment MSA viewer

**Filter Results**

**Organism** only top 20 will appear exclude

Type common name, binomial, taxid or group name

[+ Add organism](#)

**Percent Identity** to **E value** to **Query Coverage** to

[Filter](#) [Reset](#)

**Descriptions** Graphic Summary Alignments Taxonomy

**Sequences producing significant alignments** Download Manage Columns Show 100

select all 100 sequences selected

|                                     | Description                                                                    | Max Score | Total Score | Query Cover | E value | Per. Ident | Accession       |
|-------------------------------------|--------------------------------------------------------------------------------|-----------|-------------|-------------|---------|------------|-----------------|
| <input checked="" type="checkbox"/> | hypoxanthine phosphoribosyltransferase [Parabacteroides sp. D13]               | 787       | 787         | 100%        | 0.0     | 100.00%    | EEU50637.1      |
| <input checked="" type="checkbox"/> | hypoxanthine phosphoribosyltransferase [Bacteroides sp. 2_1_33B]               | 779       | 779         | 100%        | 0.0     | 99.58%     | EEY82194.1      |
| <input checked="" type="checkbox"/> | hypoxanthine phosphoribosyltransferase [Parabacteroides sp. CAG.2]             | 659       | 659         | 84%         | 0.0     | 100.00%    | CDB49403.1      |
| <input checked="" type="checkbox"/> | hypoxanthine phosphoribosyltransferase [Parabacteroides distasonis]            | 651       | 651         | 84%         | 0.0     | 99.50%     | WP_0058854803.1 |
| <input checked="" type="checkbox"/> | hypoxanthine phosphoribosyltransferase [Parabacteroides distasonis CL09T03C24] | 649       | 649         | 84%         | 0.0     | 99.00%     | EKN27939.1      |
| <input checked="" type="checkbox"/> | hypoxanthine phosphoribosyltransferase [Porphyromonas sp. 31_2]                | 633       | 633         | 82%         | 0.0     | 99.49%     | KEJ83928.1      |
| <input checked="" type="checkbox"/> | MULTISPECIES: hypoxanthine phosphoribosyltransferase [Bacteroidales]           | 581       | 581         | 74%         | 0.0     | 100.00%    | WP_034527250.1  |
| <input checked="" type="checkbox"/> | MULTISPECIES: hypoxanthine phosphoribosyltransferase [Bacteroidales]           | 574       | 574         | 74%         | 0.0     | 99.44%     | WP_010183721.1  |
| <input checked="" type="checkbox"/> | MULTISPECIES: hypoxanthine phosphoribosyltransferase [Parabacteroides]         | 571       | 571         | 74%         | 0.0     | 98.88%     | WP_008778162.1  |



**A.**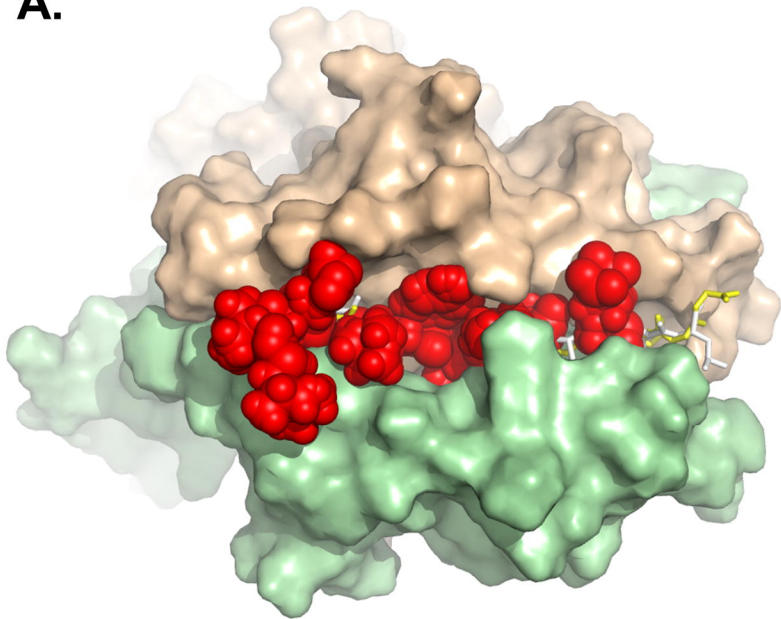**B.**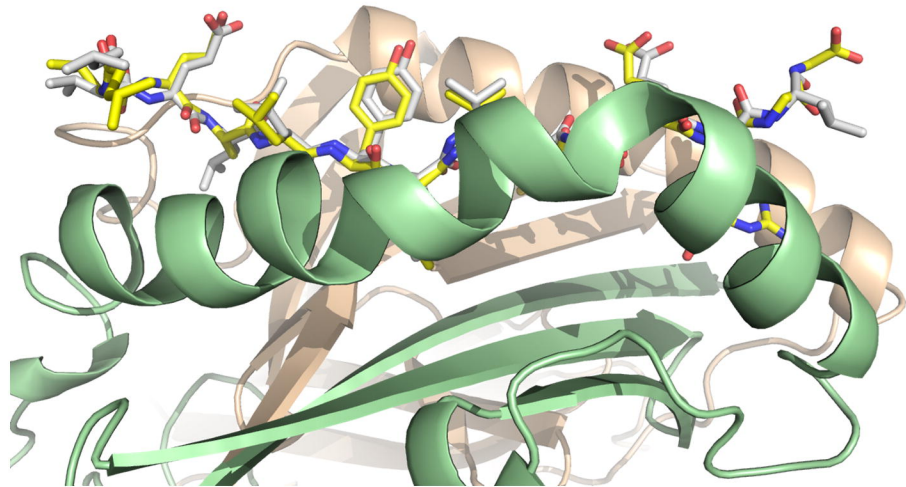

**A.** Peritoneal Mac Presentation to IIT-3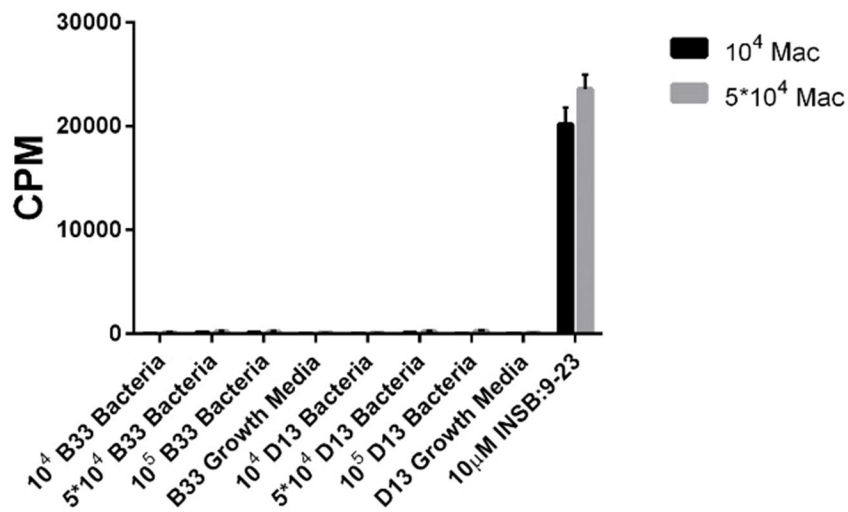**B.** Peritoneal Mac Presentation to IIT-3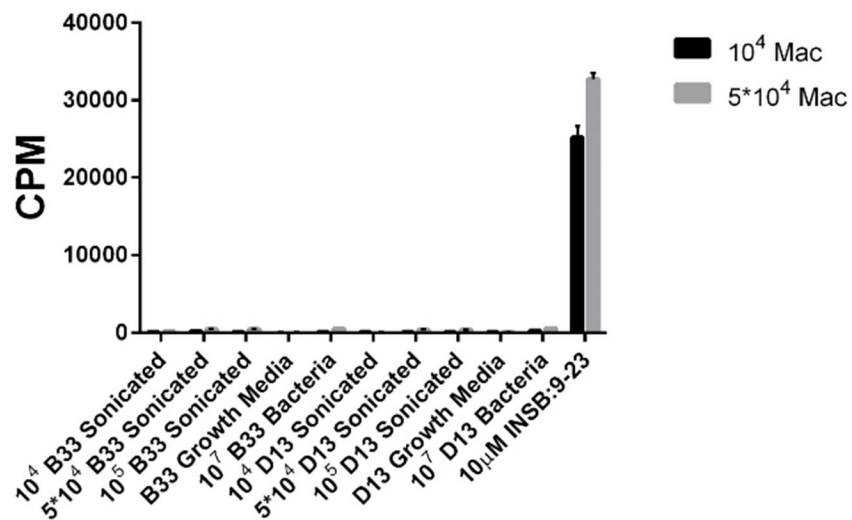

## Peritoneal Mac Presentation to 8F10

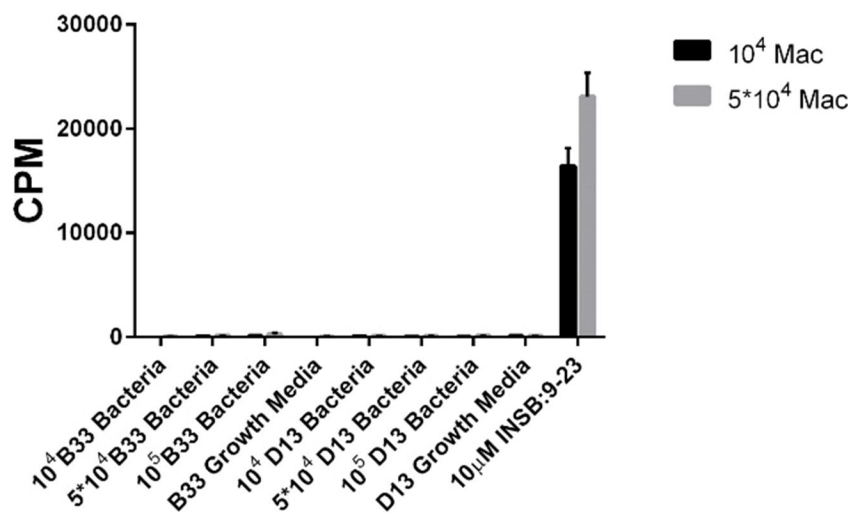

## Peritoneal Mac Presentation to 8F10

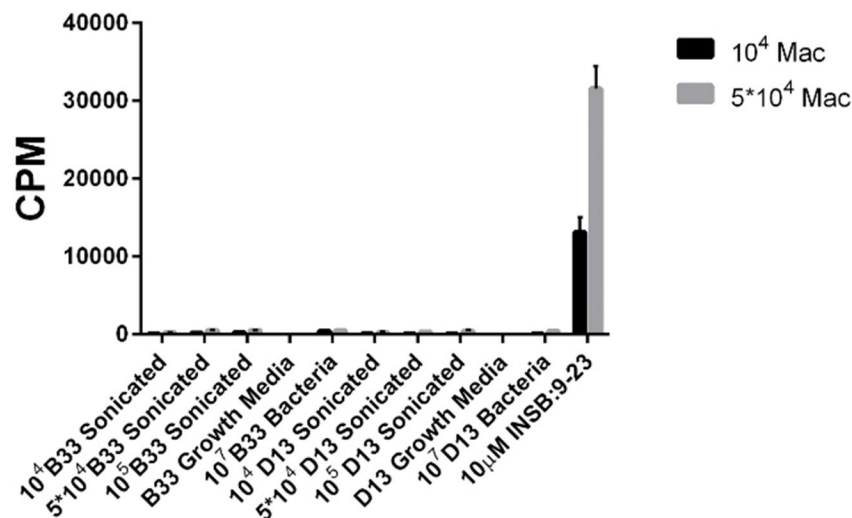**C.**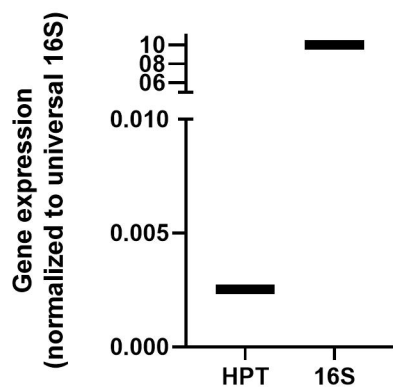

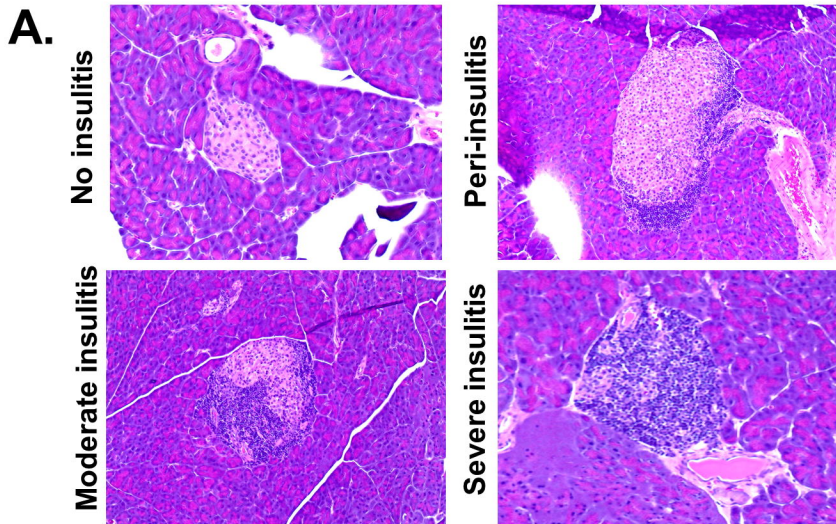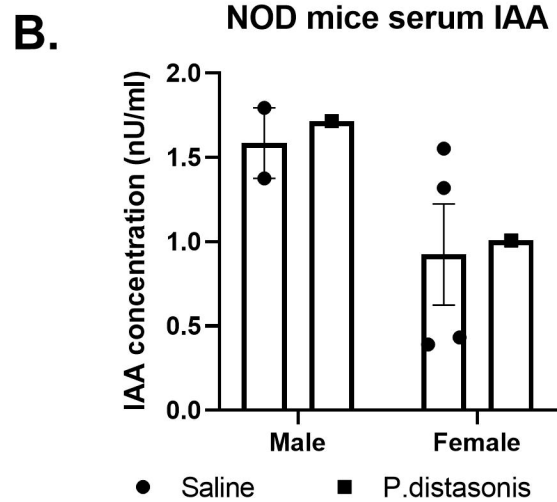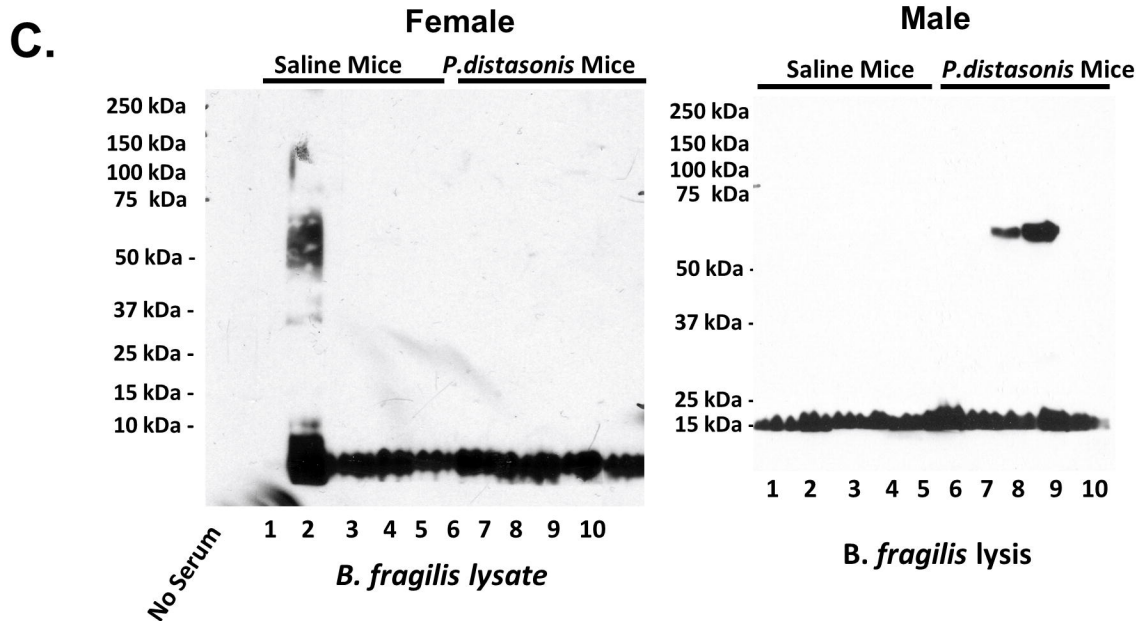

Source: https://www.biorxiv.org/content/biorxiv/early/2020/10/22/2020.10.22.350801.full.pdf
